# Supplementary material for: Ubiquitin Ligase ITCH Regulates Life Cycle of SARS-CoV-2 Virus
Source: eLife journal article supplement (doi:10.7554/elife.105105), 2025-02-25
Supplement: fig3-figsupp1-data1 [file Figure 3-figure supplement 1C.pdf › Figure 3-figure supplement 1C.pdf]

# S3C

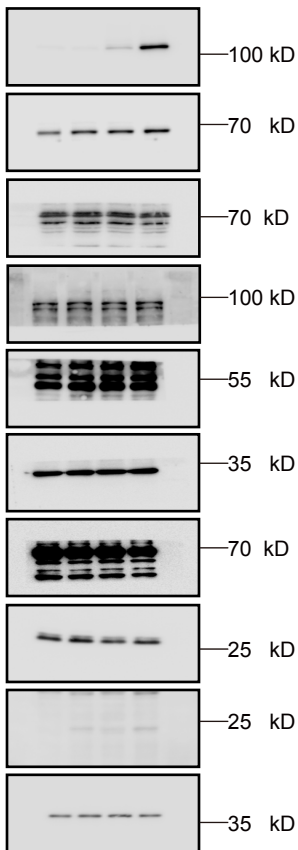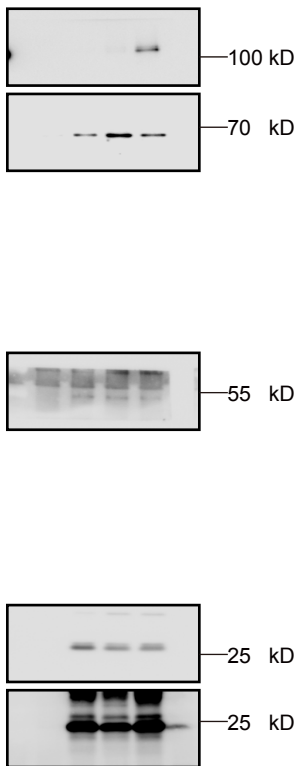

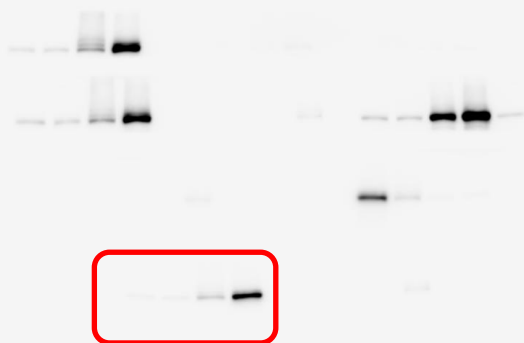

**ITCH**

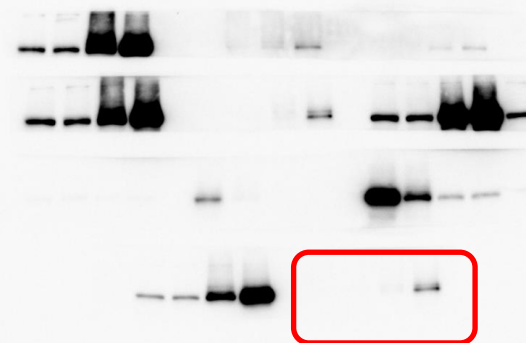

**ITCH**

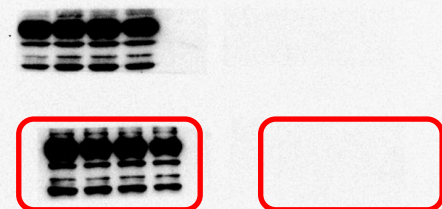

**Anti-OPTN**

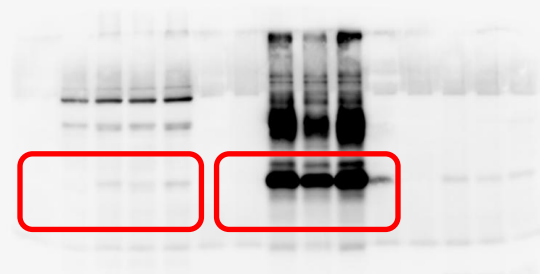

**Anti-Flag**

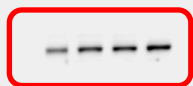

**Anti-p62**

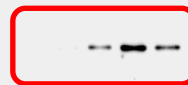

**Anti-p62**

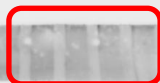

**Anti-FAM134B**

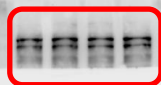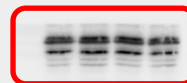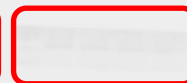

**Anti-NBR1**

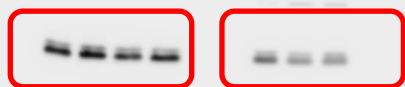

**Anti-RTN3**

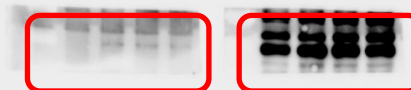

**Anti-NDP52**

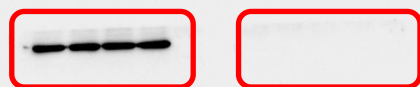

**Anti-NIX**

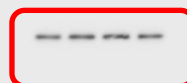

**Anti-GADPH**
