# Supplementary figures and images for: Ubiquitin Ligase ITCH Regulates Life Cycle of SARS-CoV-2 Virus
Source: eLife journal article supplement (doi:10.7554/elife.105105), 2025-02-25

1A

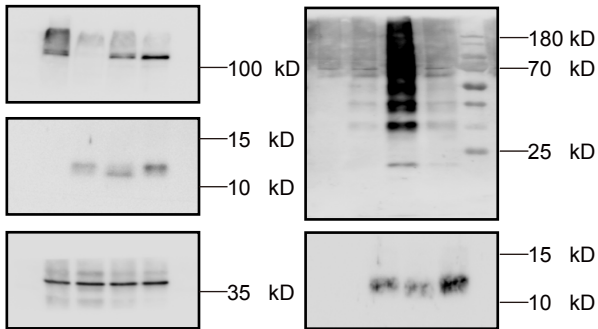

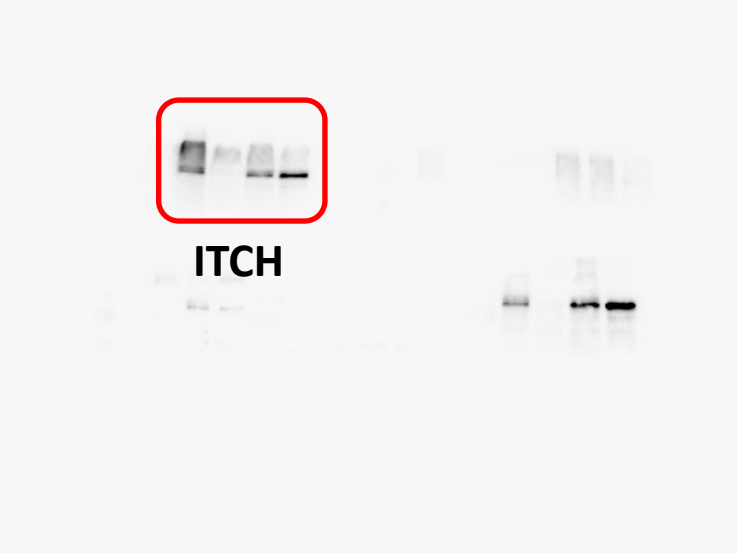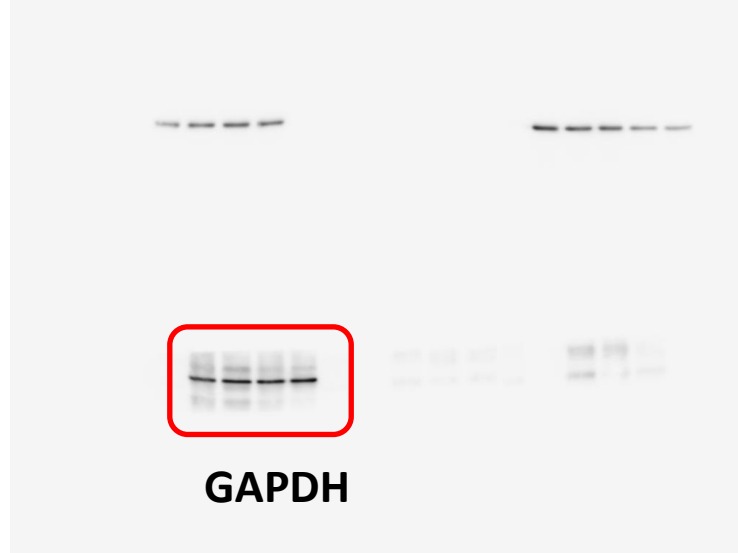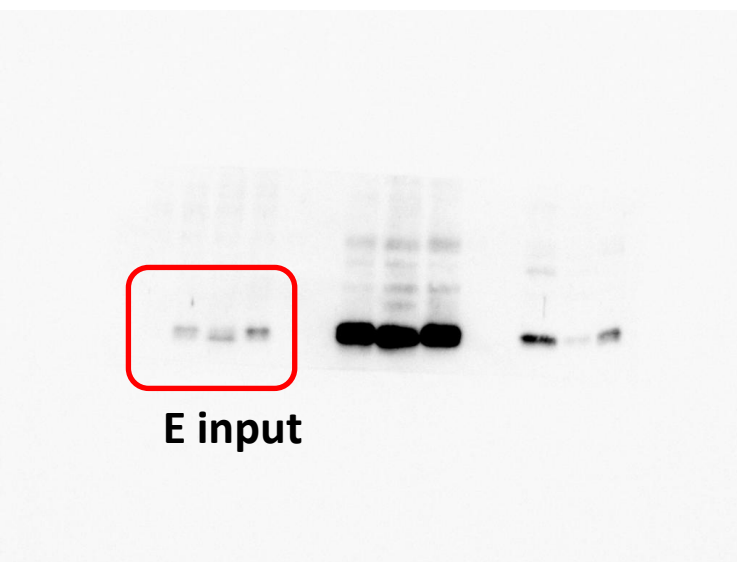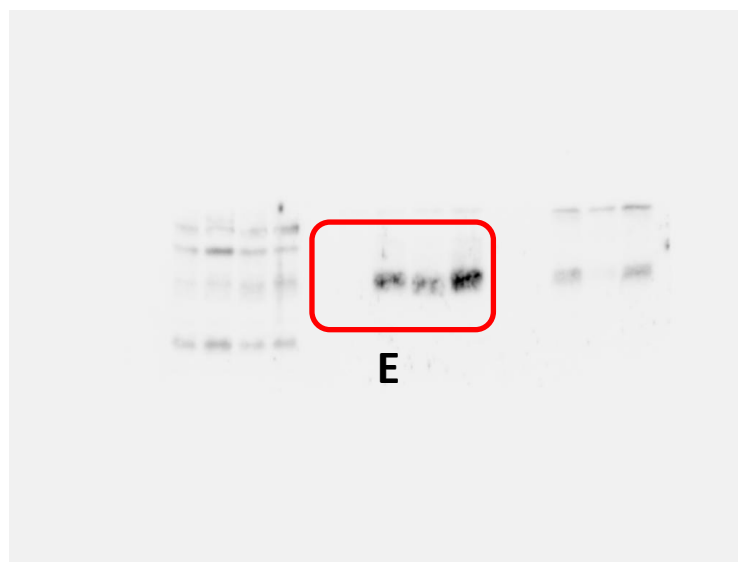

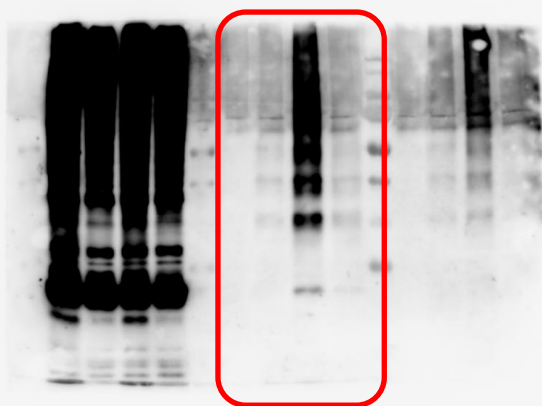

**ubi**

Supplement: fig1-data1 [file Figure 1A.pdf › Figure 1A.pdf]

1B

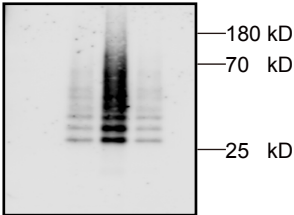

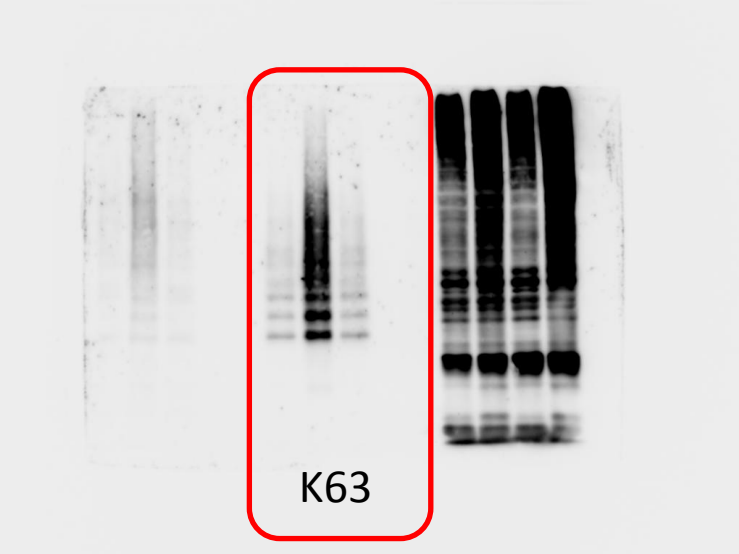

Supplement: fig1-data1 [file Figure 1B.pdf › Figure 1B.pdf]

1C

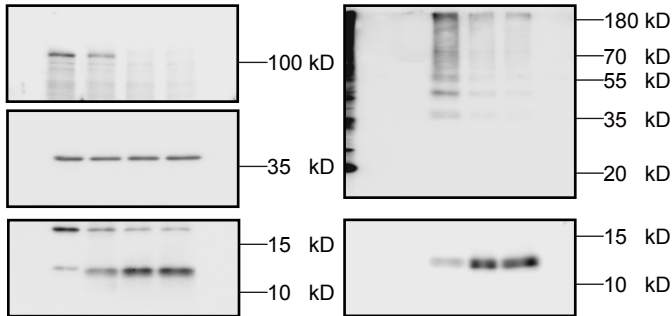

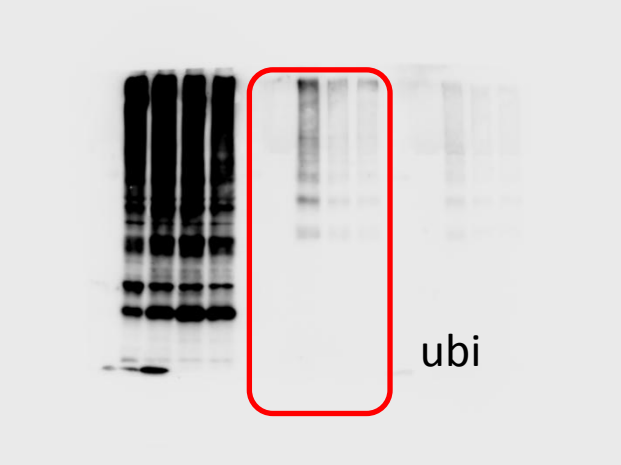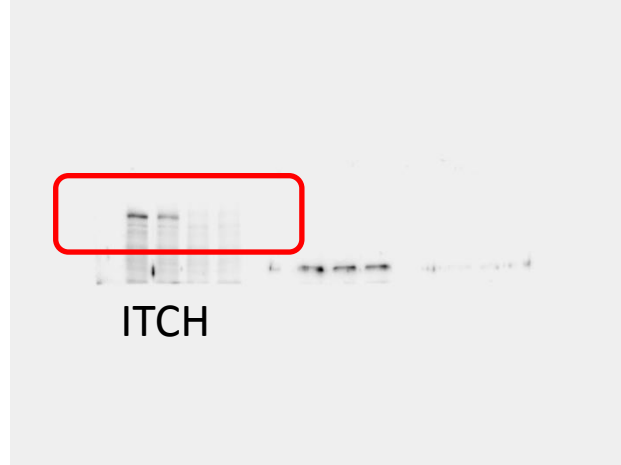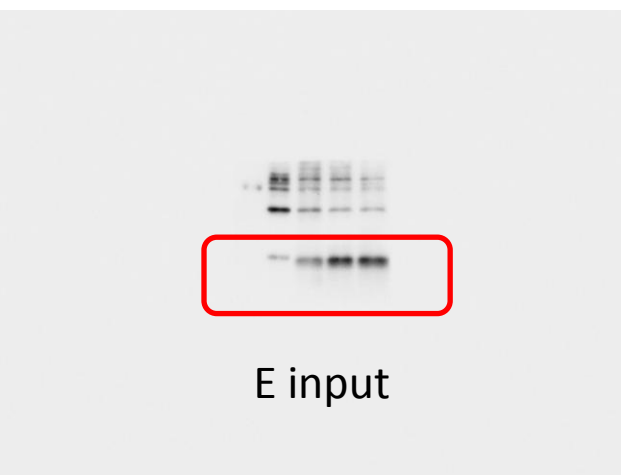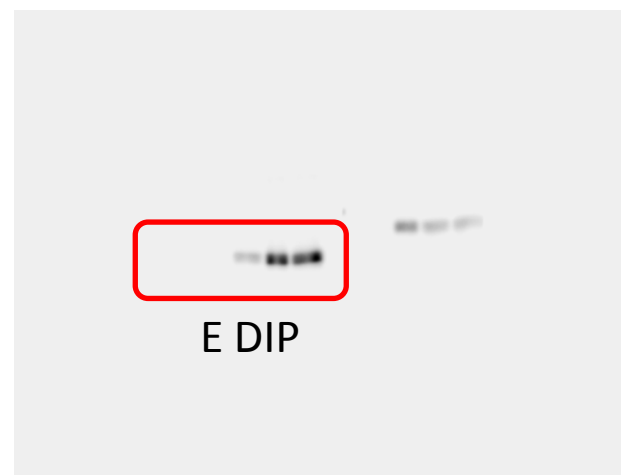

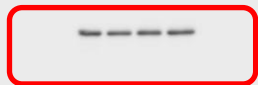

GADPH

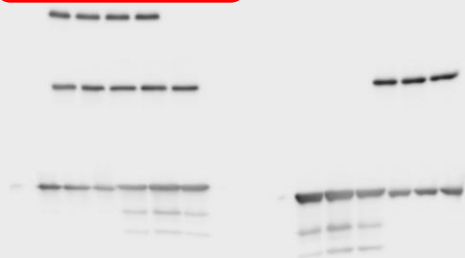

Supplement: fig1-data1 [file Figure 1C.pdf › Figure 1C.pdf]

1D

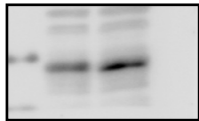

—15 kD

—10 kD

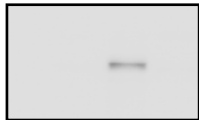

—100 kD

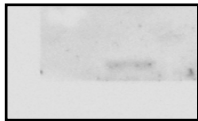

—15 kD

—10 kD

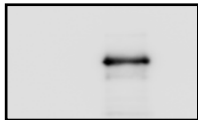

—100 kD

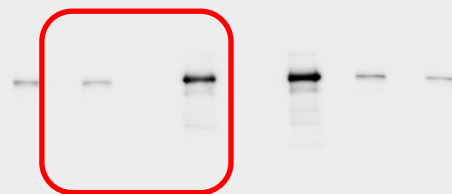

**ITCH**

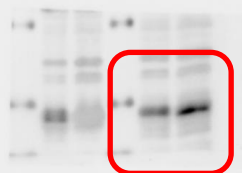

**E**

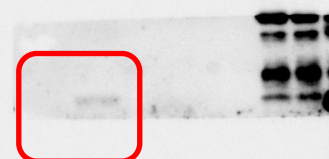

**E**

Supplement: fig1-data1 [file Figure 1D.pdf › Figure 1D.pdf]

1E

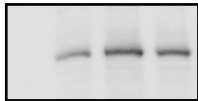

—180 kD

—100 kD

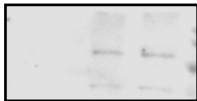

—180 kD

—100 kD

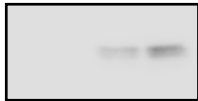

—10 kD

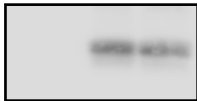

—10 kD

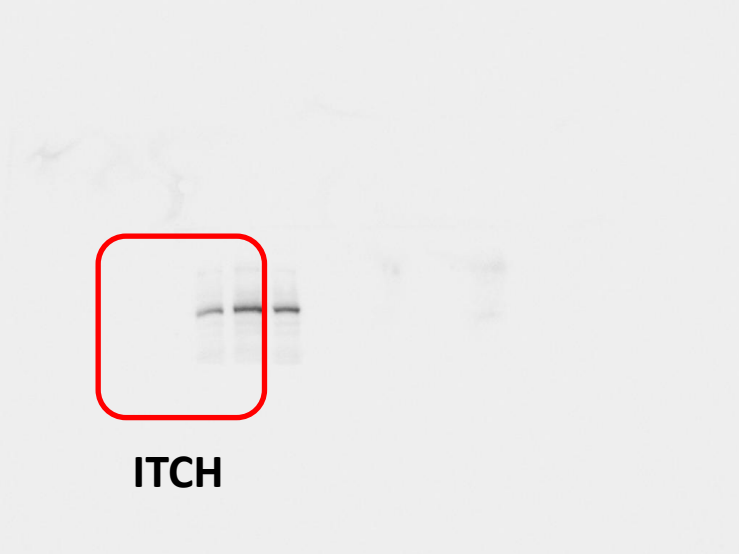

**ITCH**

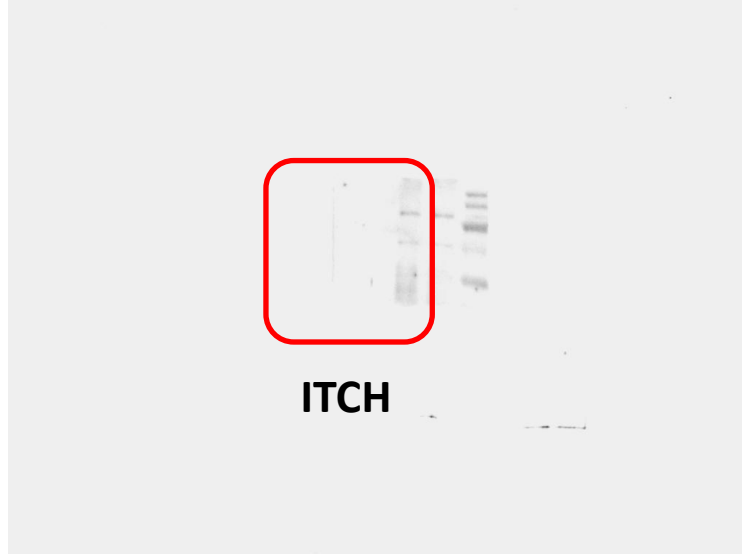

**ITCH**

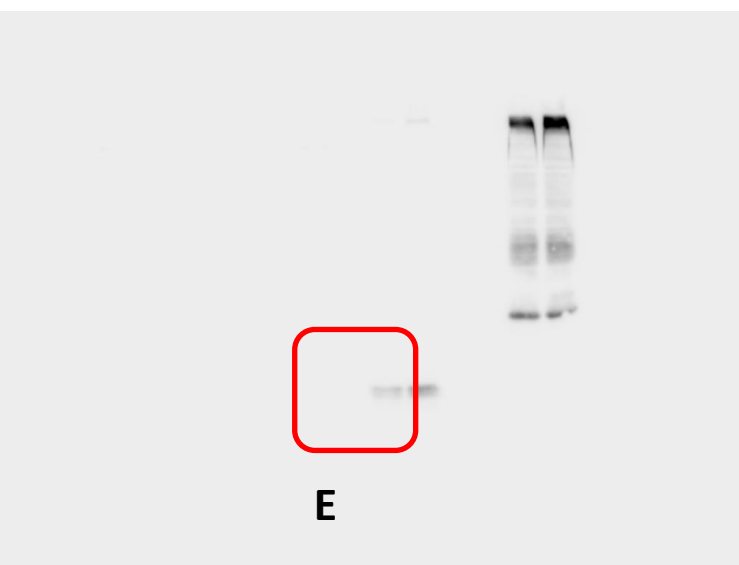

**E**

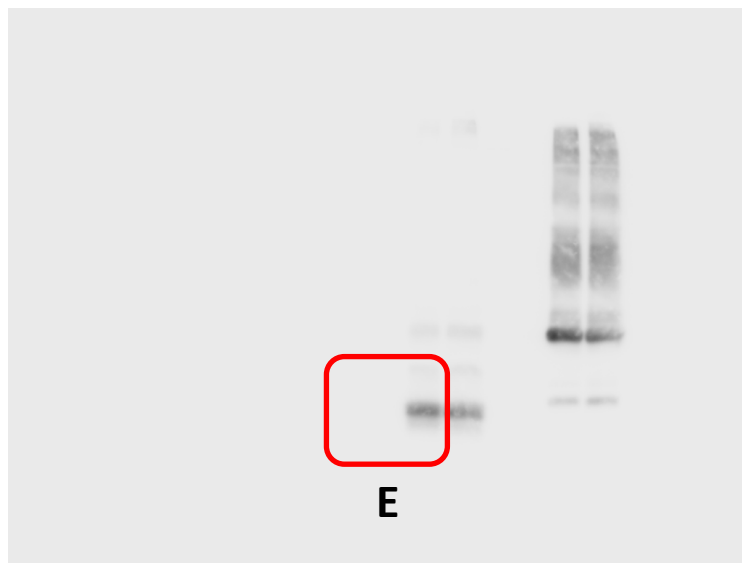

**E**

Supplement: fig1-data1 [file Figure 1E.pdf › Figure 1E.pdf]

1G

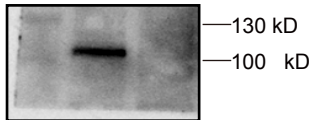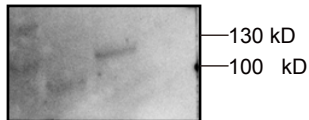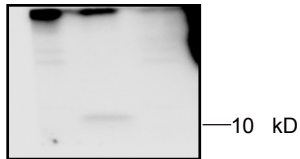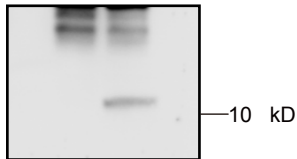

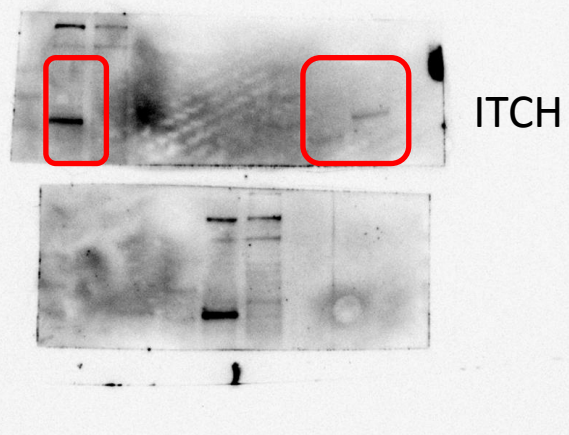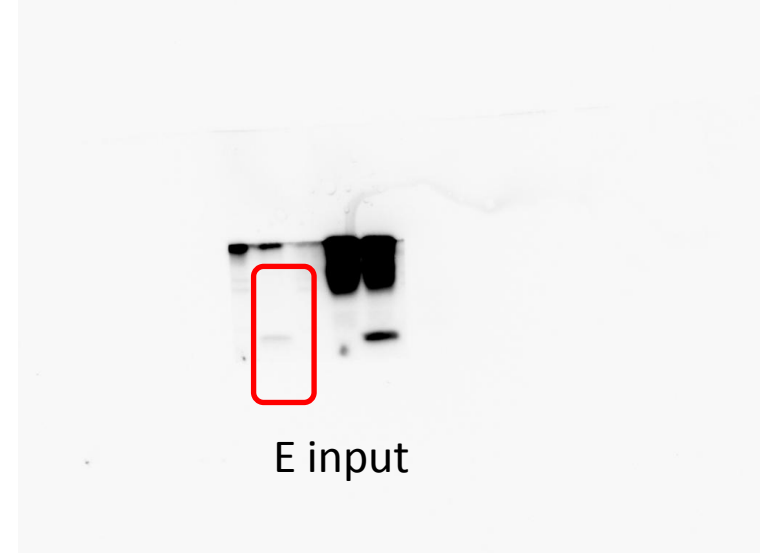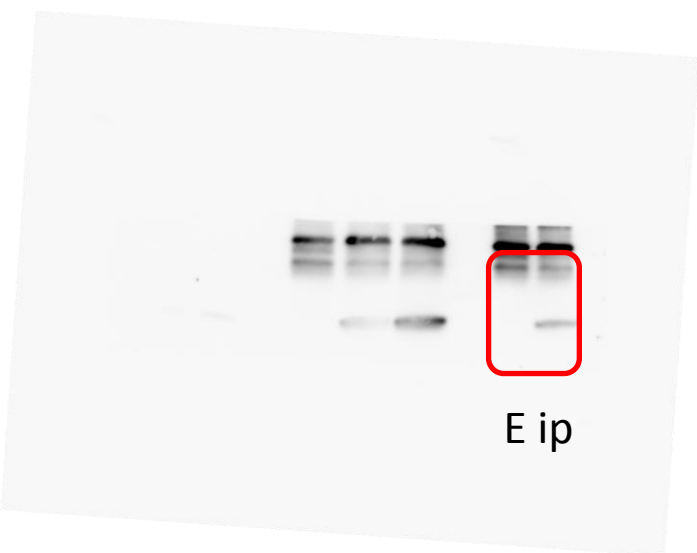

Supplement: fig1-data1 [file Figure 1G.pdf › Figure 1G.pdf]

1H

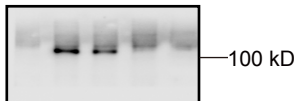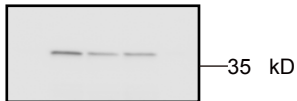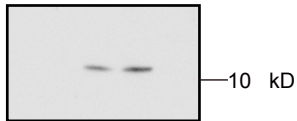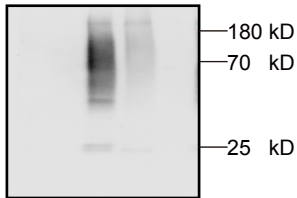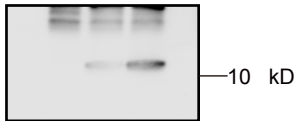

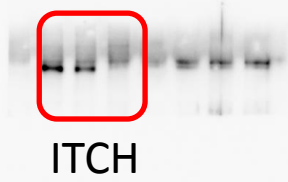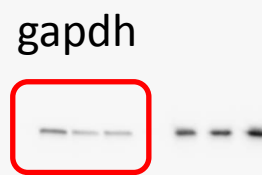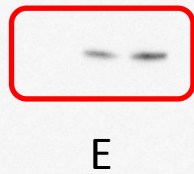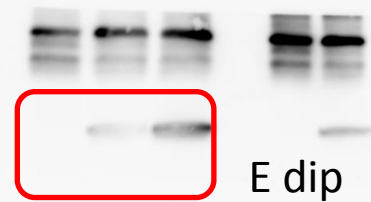

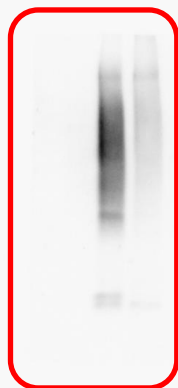

E ubi

Supplement: fig1-data1 [file Figure 1H.pdf › Figure 1H.pdf]

S1D

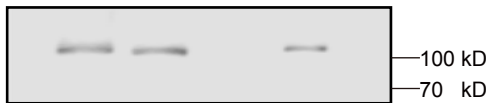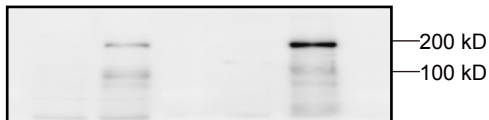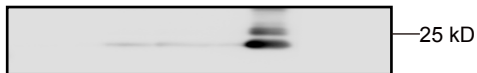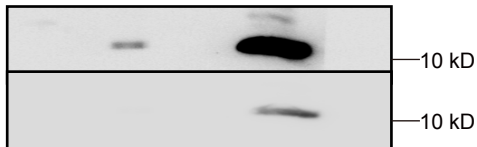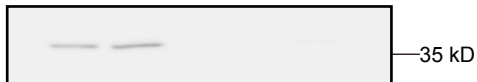

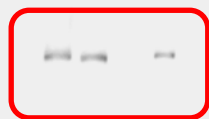

ITCH

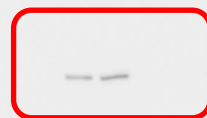

GAPDH

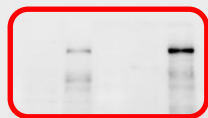

Spike

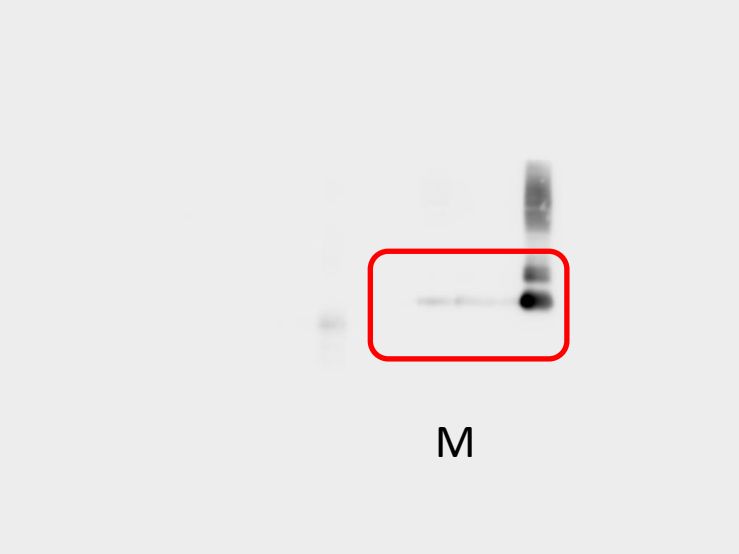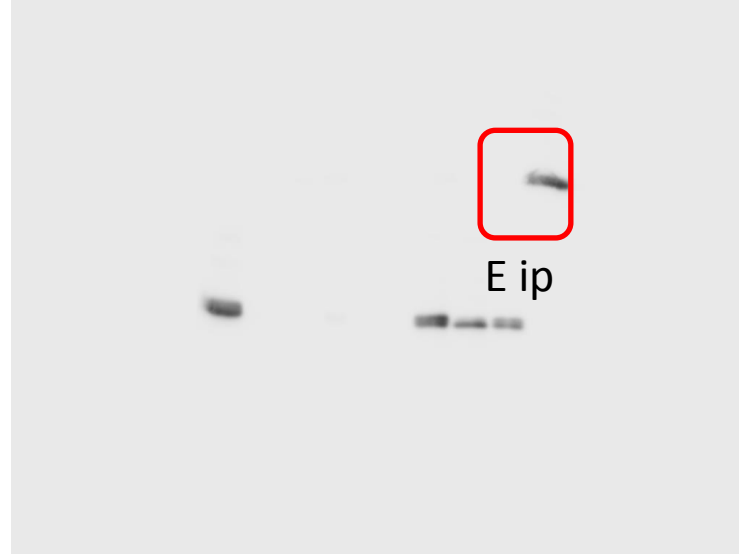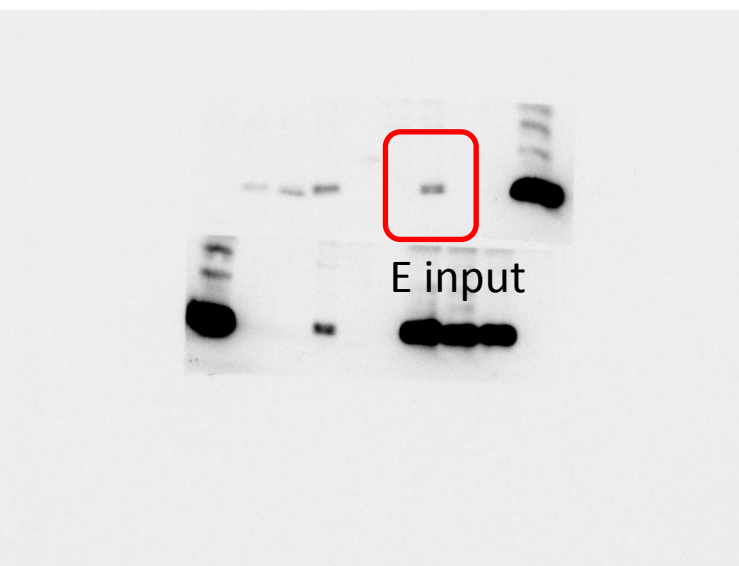

Supplement: fig1-figsupp1-data1 [file Figure 1-Figure supplement 1D.pdf › Figure 1-Figure supplement 1D.pdf]

S1E

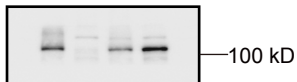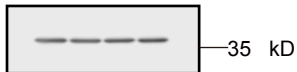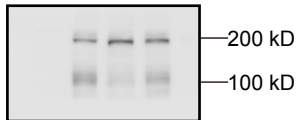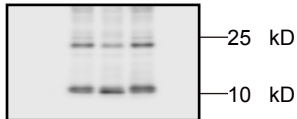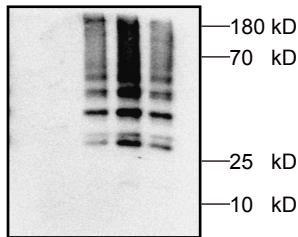

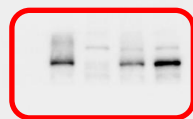

ITCH

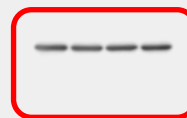

GAPDH

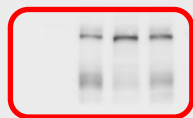

Spike

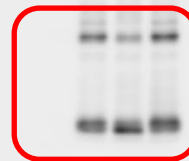

E+M

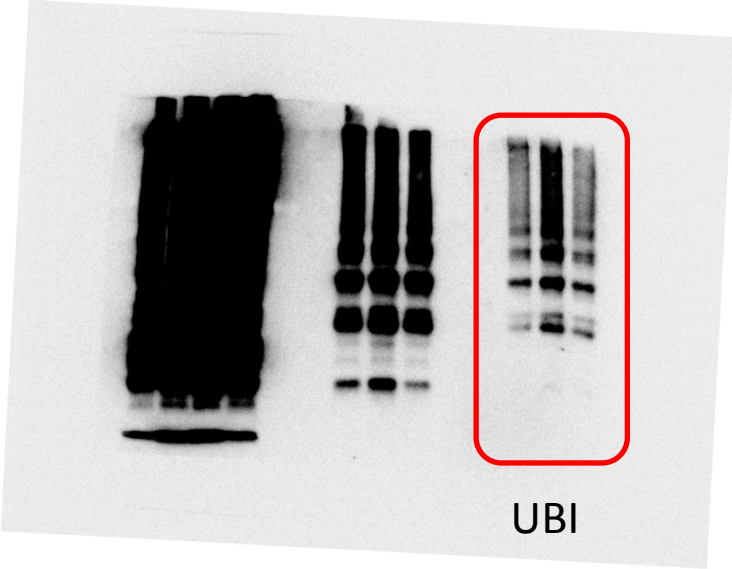

Supplement: fig1-figsupp1-data1 [file Figure 1-Figure supplement 1E.pdf › Figure 1-Figure supplement 1E.pdf]

S1F

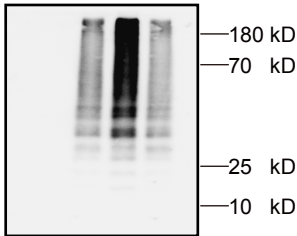

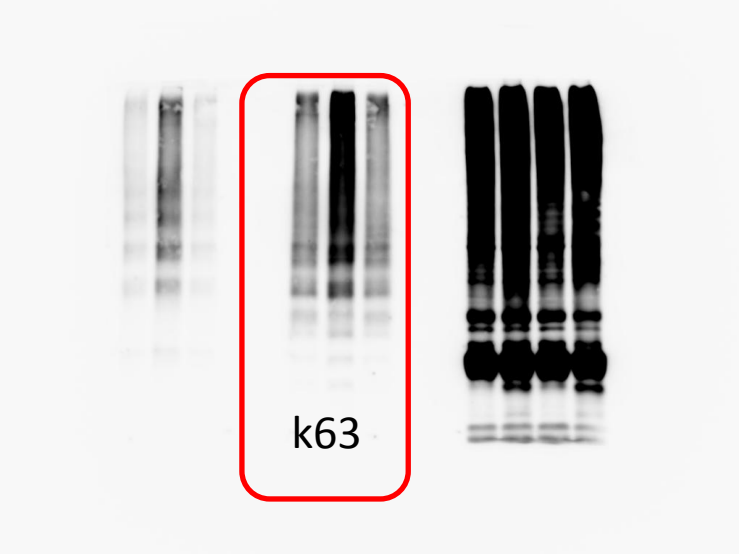

Supplement: fig1-figsupp1-data1 [file Figure 1-Figure supplement 1F.pdf › Figure 1-Figure supplement 1F.pdf]

# S1G

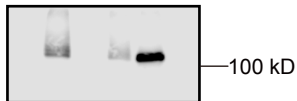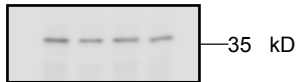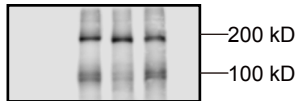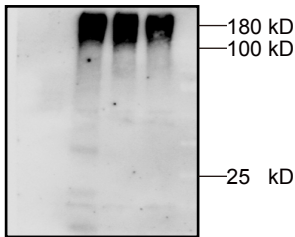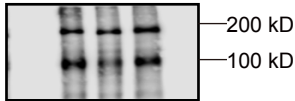

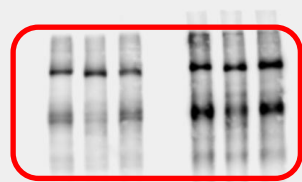

Spike

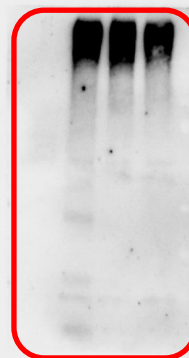

Ubi

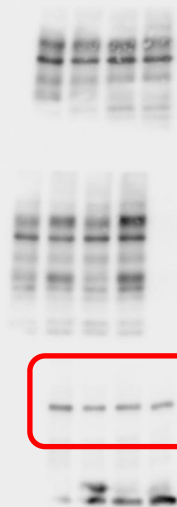

gapdh

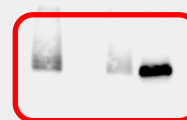

ITCH

Supplement: fig1-figsupp1-data1 [file Figure 1-Figure supplement 1G.pdf › Figure 1-Figure supplement 1G.pdf]

S1H

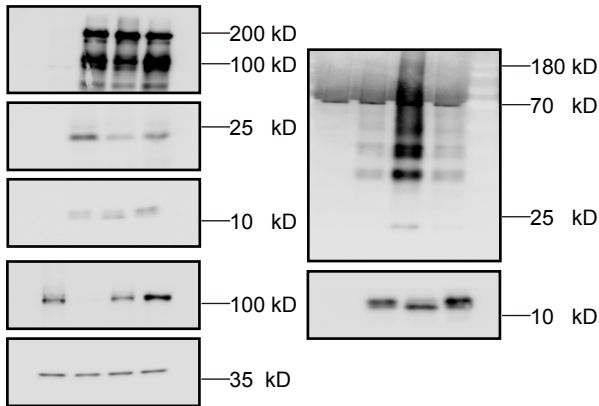

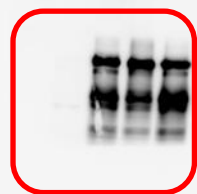

Spike

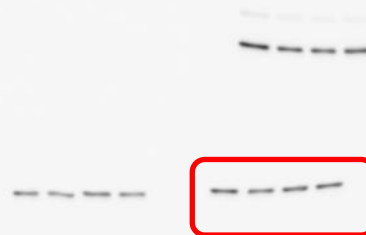

GAPDH

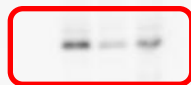

M

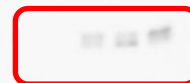

E

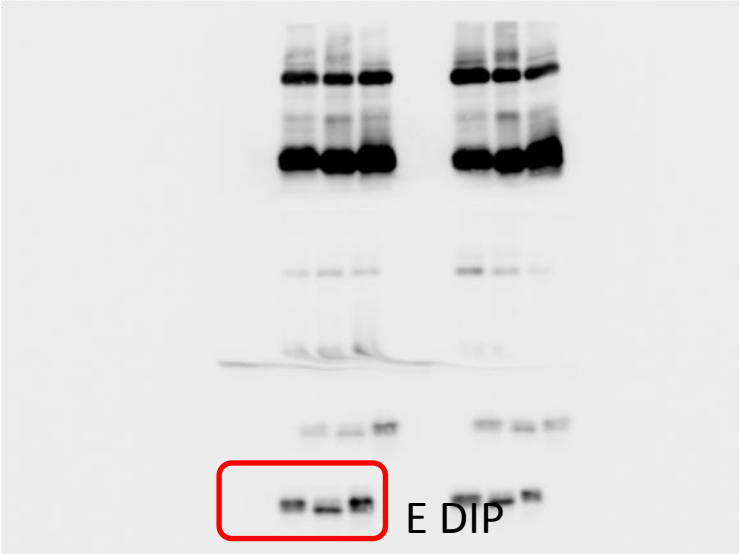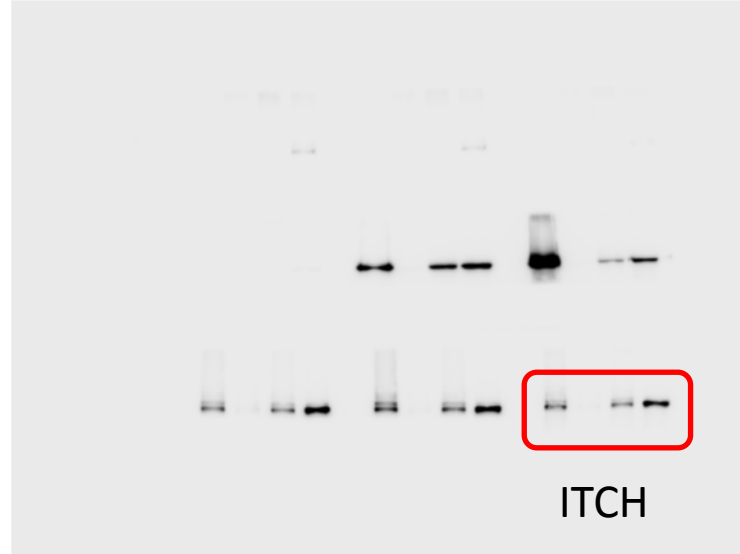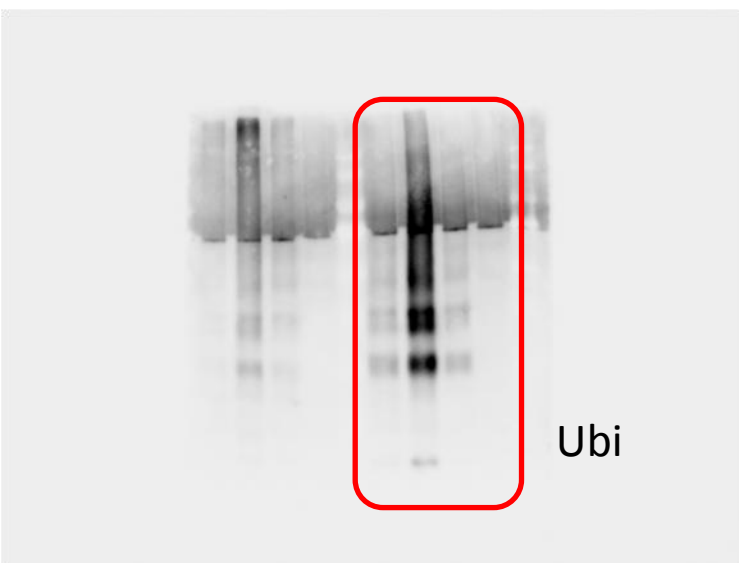

Supplement: fig1-figsupp1-data1 [file Figure 1-Figure supplement 1H.pdf › Figure 1-Figure supplement 1H.pdf]

S1I

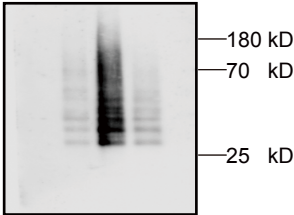

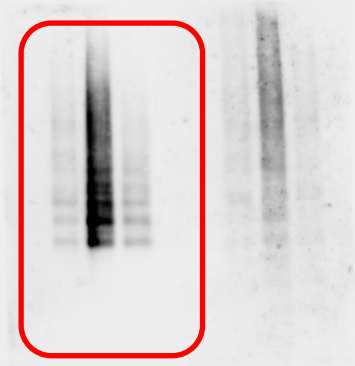

K63

Supplement: fig1-figsupp1-data1 [file Figure 1-Figure supplement 1I.pdf › Figure 1-Figure supplement 1I.pdf]

S1J

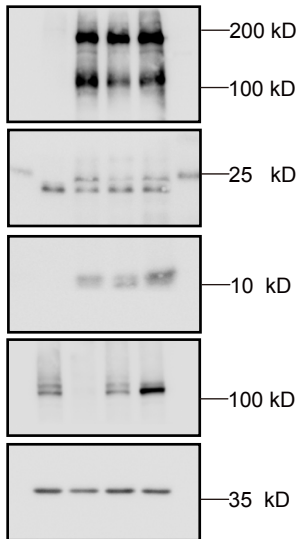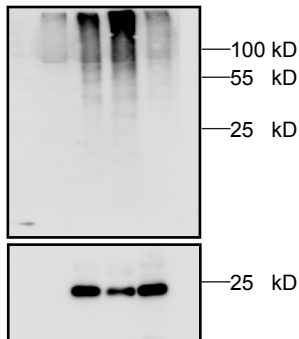

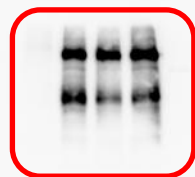

spike

M

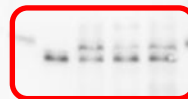

E

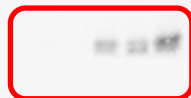

ITCH

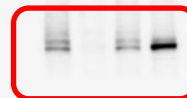

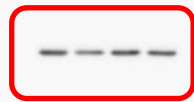

gapdh

M

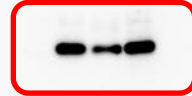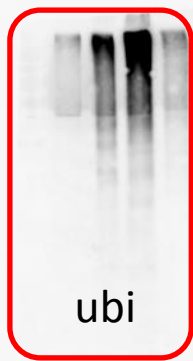

ubi

Supplement: fig1-figsupp1-data1 [file Figure 1-Figure supplement 1J.pdf › Figure 1-Figure supplement 1J.pdf]

# S1K

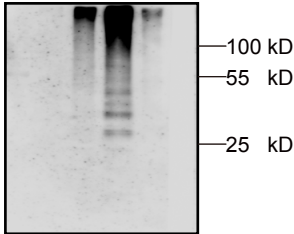

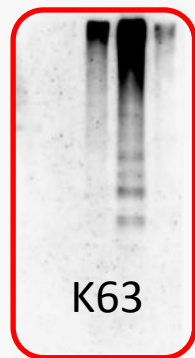

Supplement: fig1-figsupp1-data1 [file Figure 1-Figure supplement 1K.pdf › Figure 1-Figure supplement 1K.pdf]

# S2A

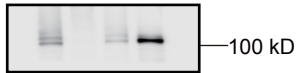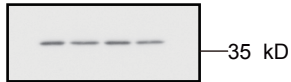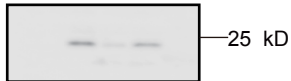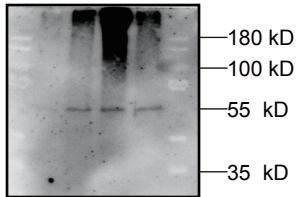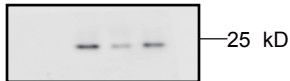

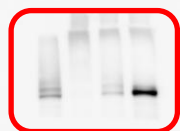

**ITCH**

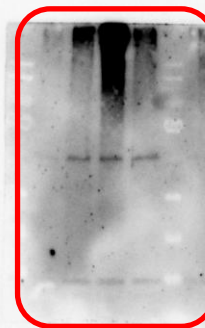

**ubi**

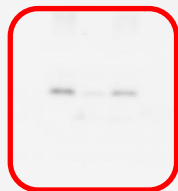

**Flag M**

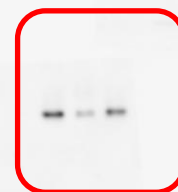

**Flag M**

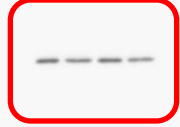

**GADPH**

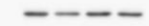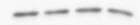

Supplement: fig1-figsupp2-data1 [file Figure 1-figure supplement 2A.pdf › Figure 1-figure supplement 2A.pdf]

# S2B

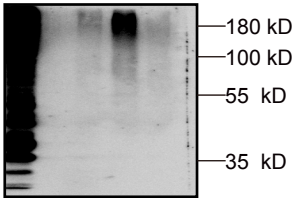

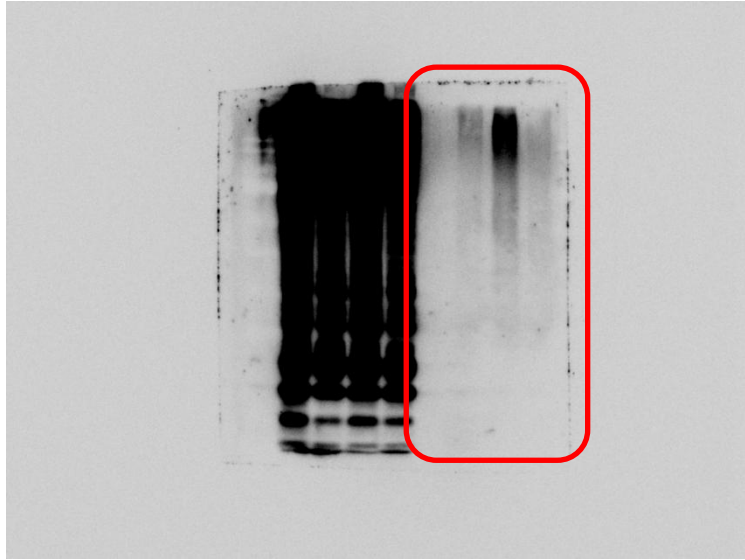

Supplement: fig1-figsupp2-data1 [file Figure 1-figure supplement 2B.pdf › Figure 1-figure supplement 2B.pdf]

# S2C

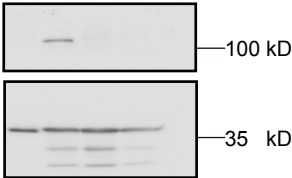

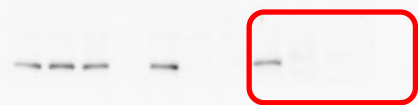

ITCH

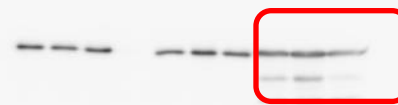

GAPDH

Supplement: fig1-figsupp2-data1 [file Figure 1-figure supplement 2C.pdf › Figure 1-figure supplement 2C.pdf]

# S2D

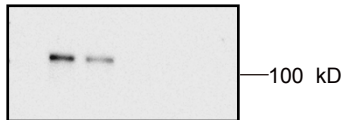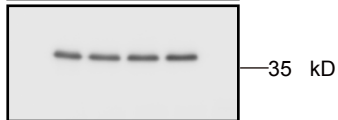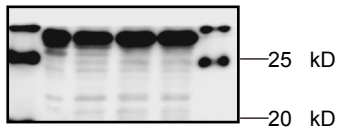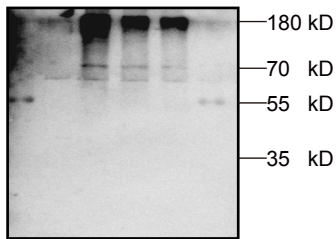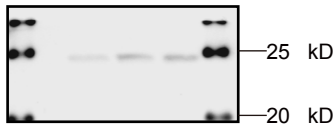

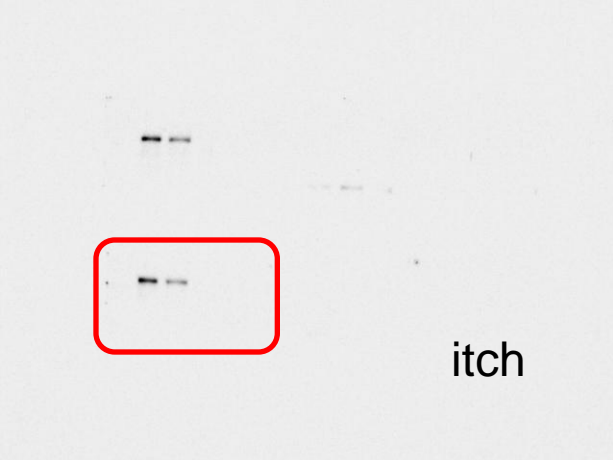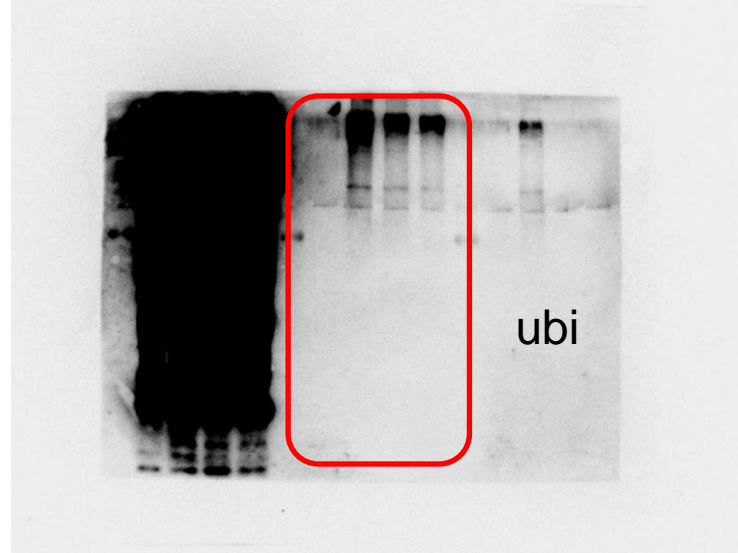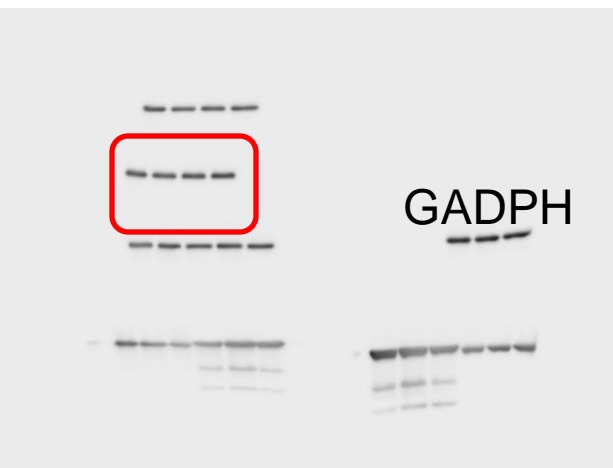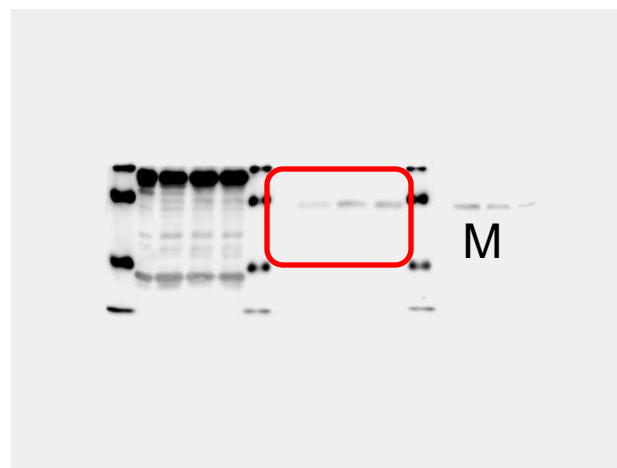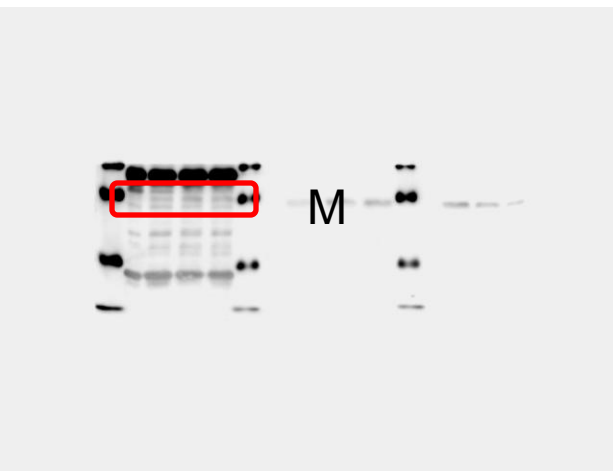

Supplement: fig1-figsupp2-data1 [file Figure 1-figure supplement 2D.pdf › Figure 1-figure supplement 2D.pdf]

S2E

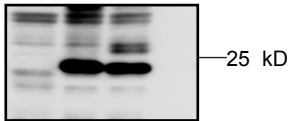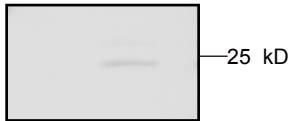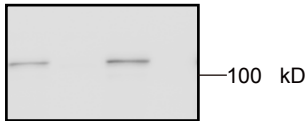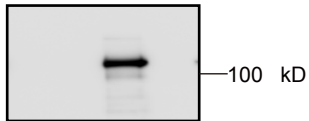

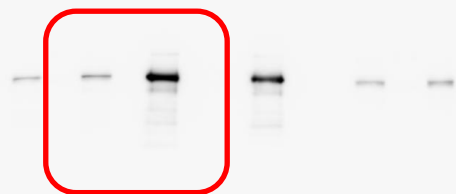

ITCH

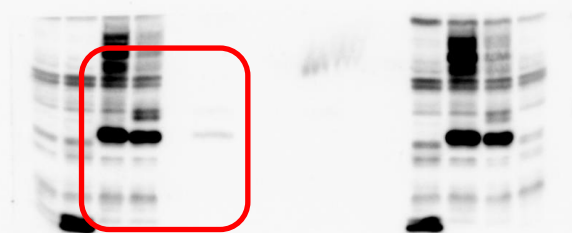

M

Supplement: fig1-figsupp2-data1 [file Figure 1-figure supplement 2E.pdf › Figure 1-figure supplement 2E.pdf]

S2F

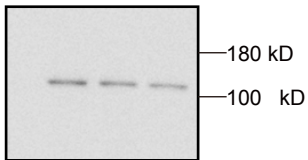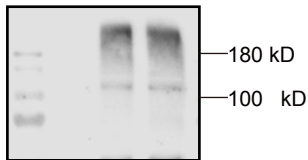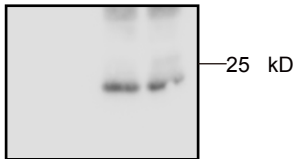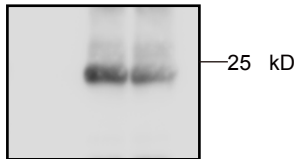

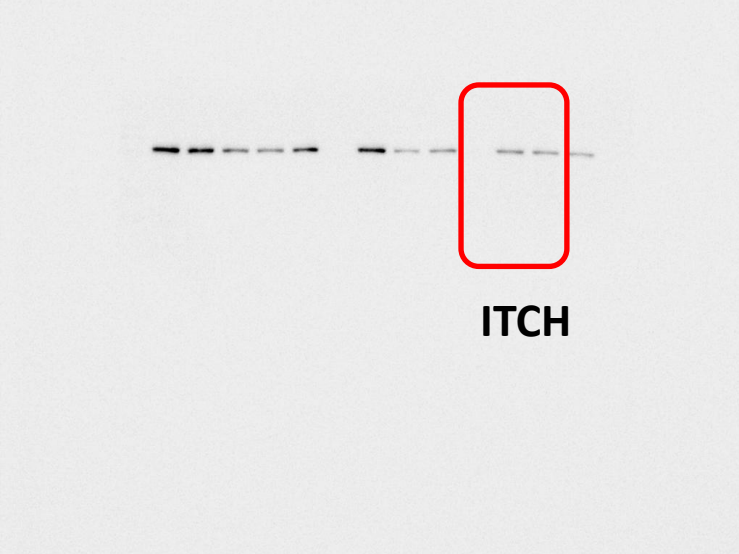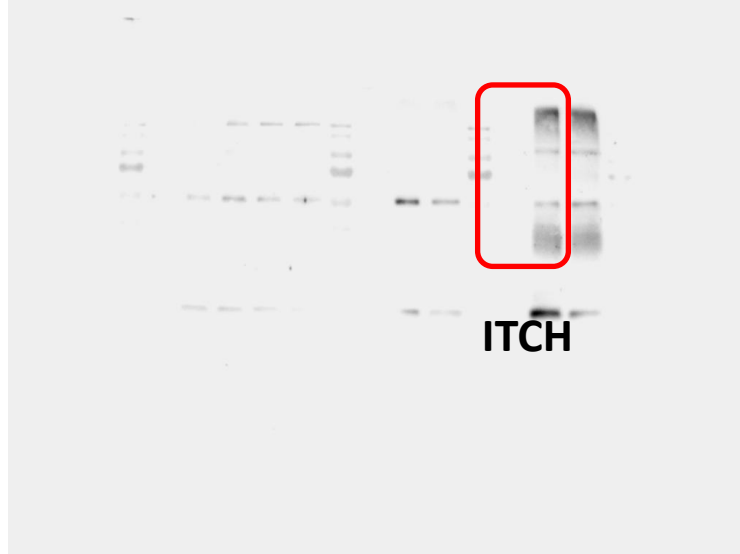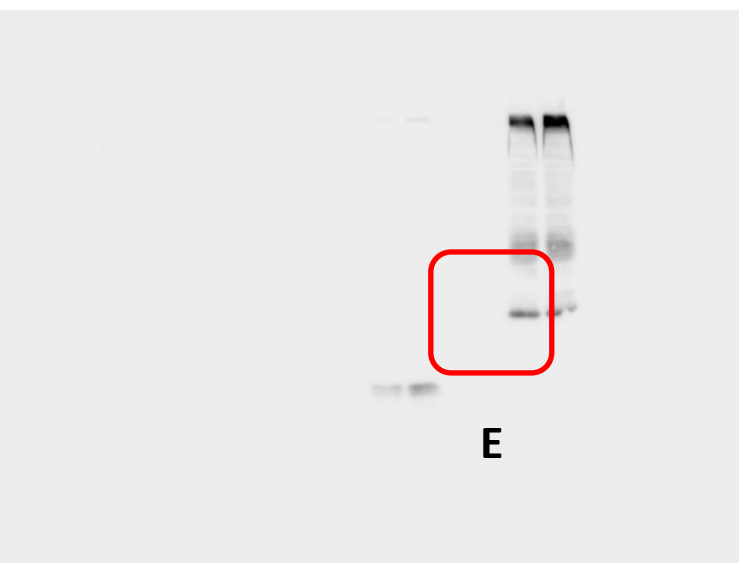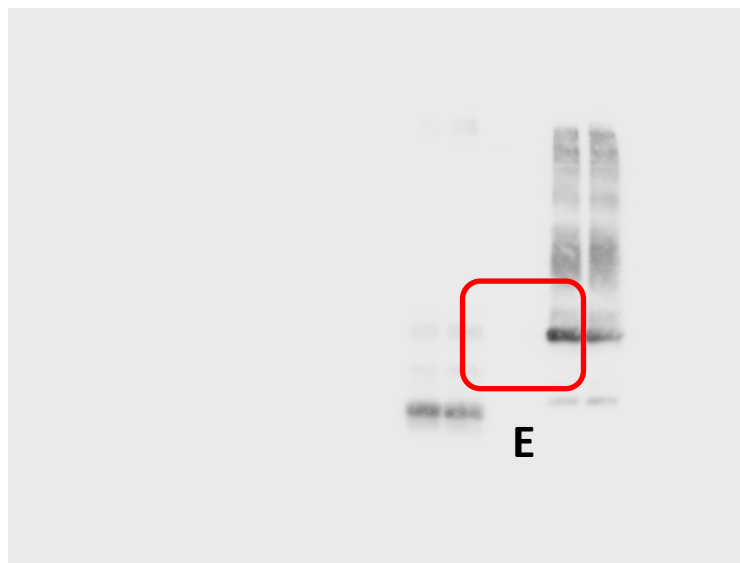

Supplement: fig1-figsupp2-data1 [file Figure 1-figure supplement 2F.pdf › Figure 1-figure supplement 2F.pdf]

# S2H

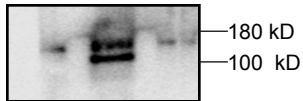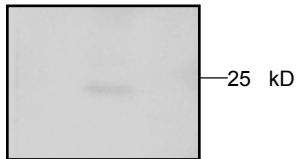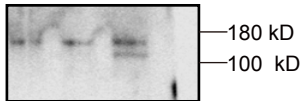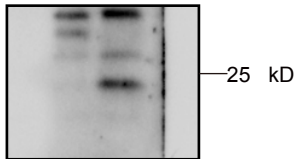

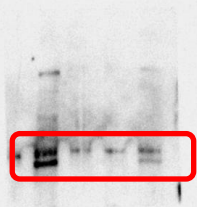

ITCH

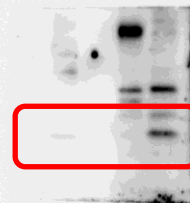

M

Supplement: fig1-figsupp2-data1 [file Figure 1-figure supplement 2H.pdf › Figure 1-figure supplement 2H.pdf]

S2I

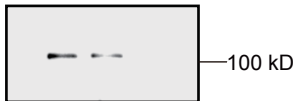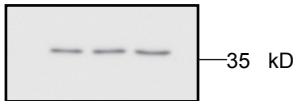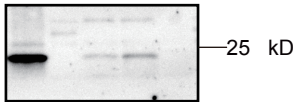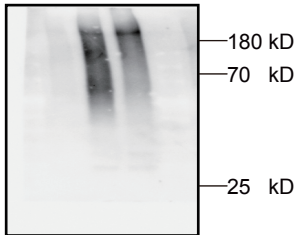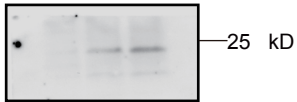

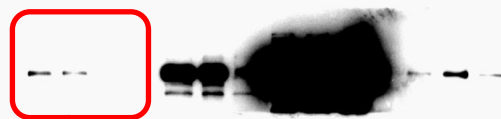

ITCH

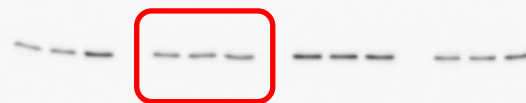

gapdh

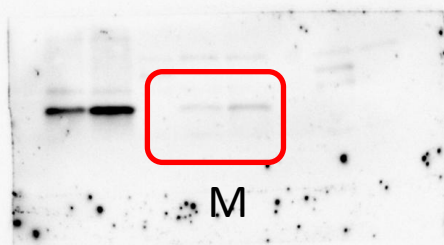

M

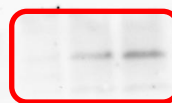

M

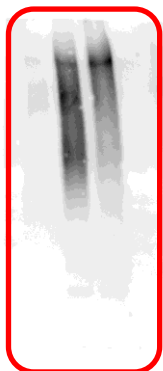

M ubi

Supplement: fig1-figsupp2-data1 [file Figure 1-figure supplement 2I.pdf › Figure 1-figure supplement 2I.pdf]

Fig. 2A

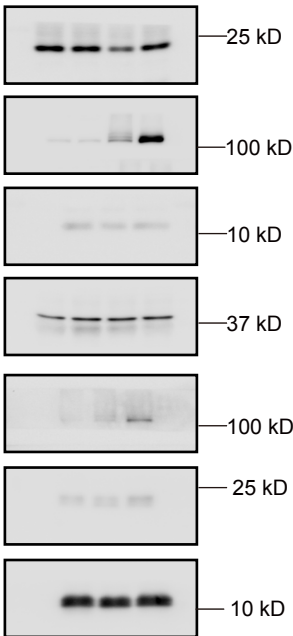

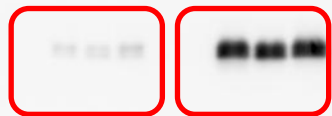

E

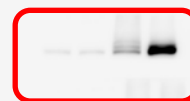

ITCH input

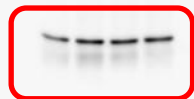

GAPDH

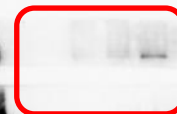

ITCH ip

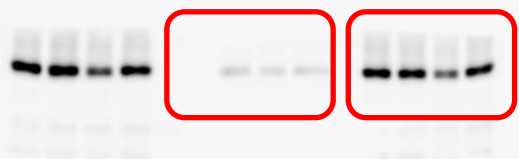

M

Supplement: fig2-data1 [file Figure 2A.pdf › Figure 2A.pdf]

2B

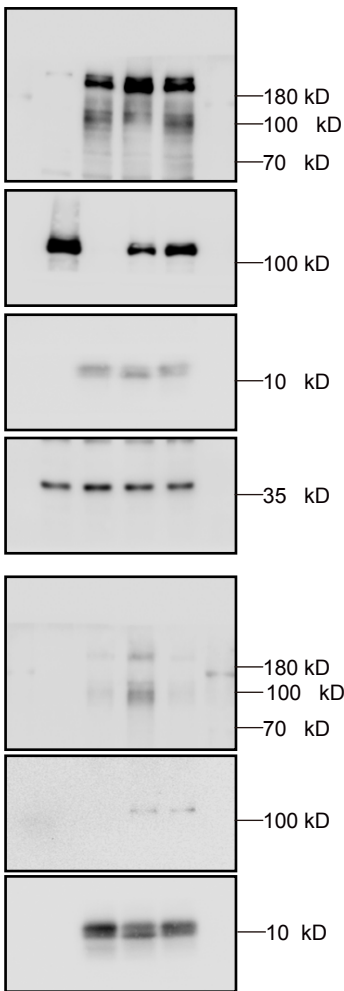

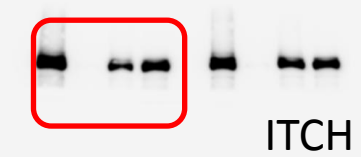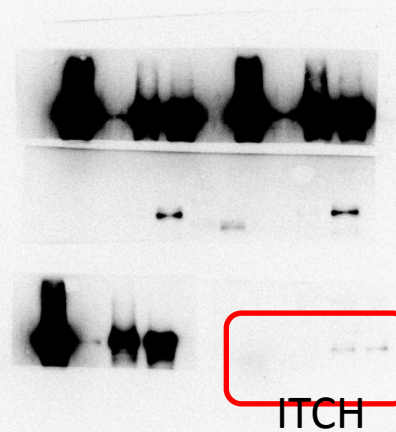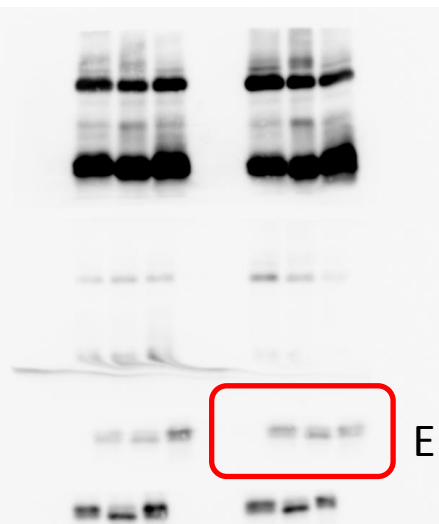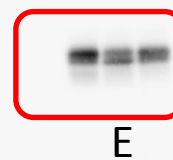

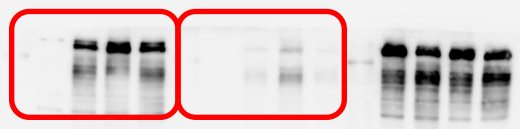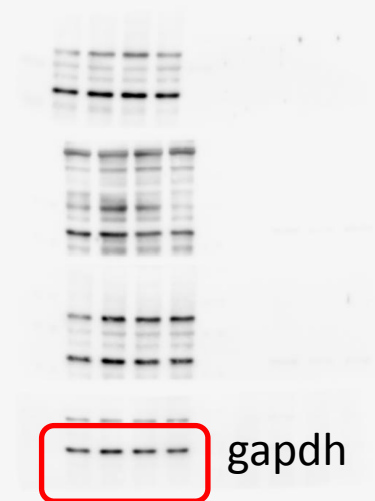

Supplement: fig2-data1 [file Figure 2B.pdf › Figure 2B.pdf]

2C

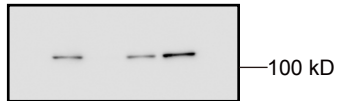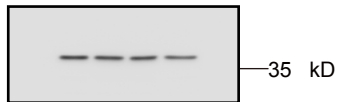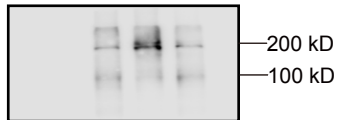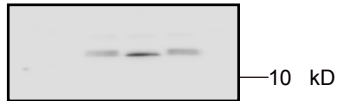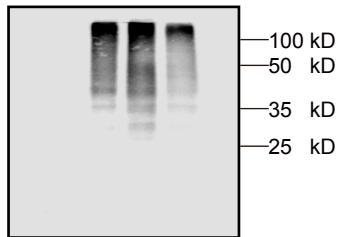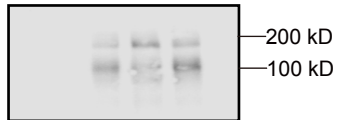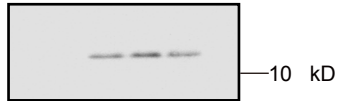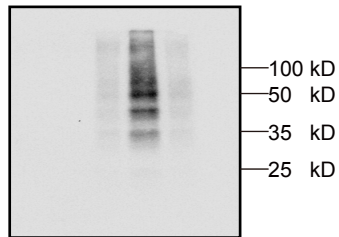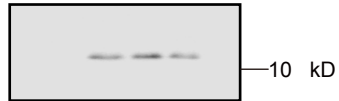

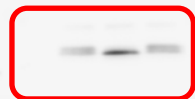

E

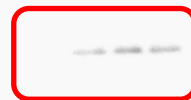

E 1IP

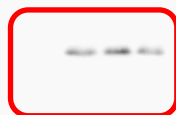

E 2IP

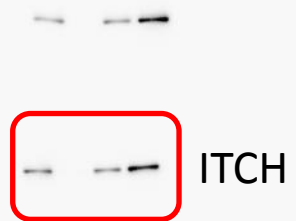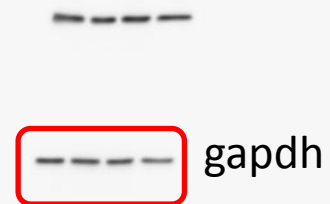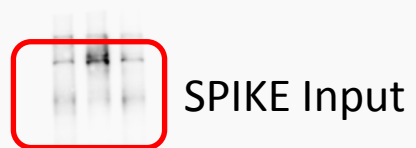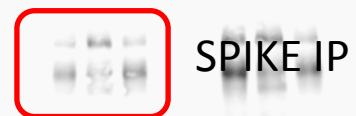

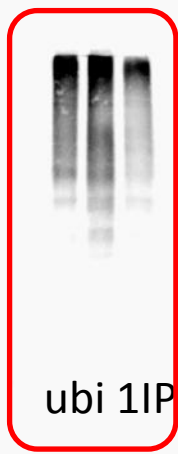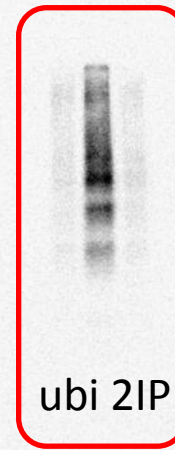

Supplement: fig2-data1 [file Figure 2C.pdf › Figure 2C.pdf]

2D

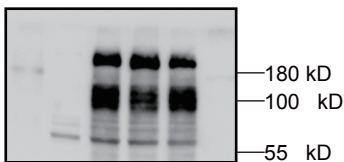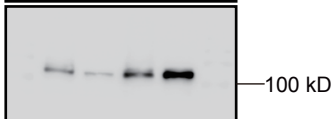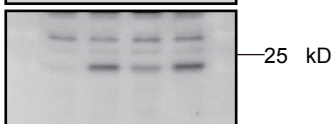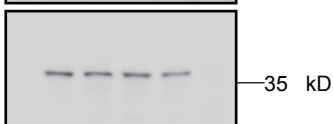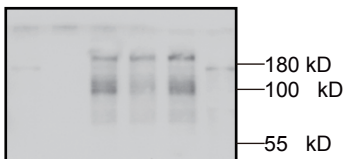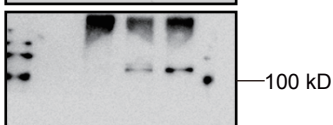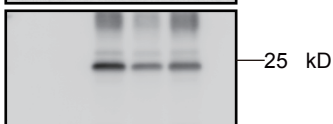

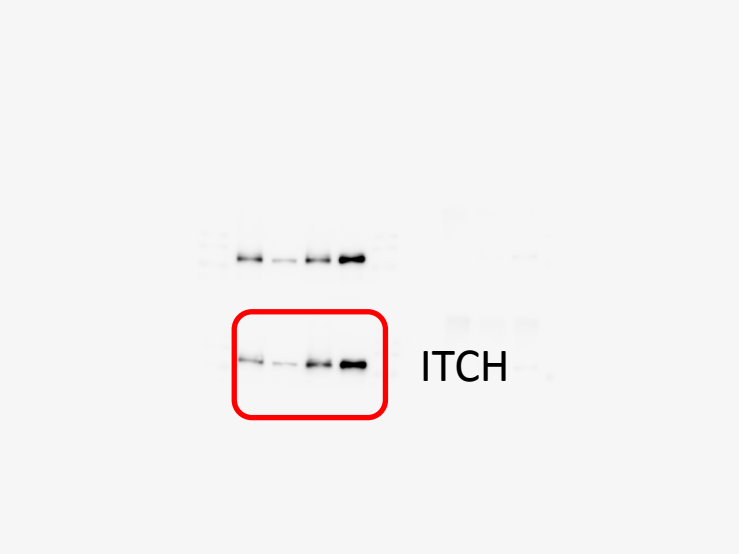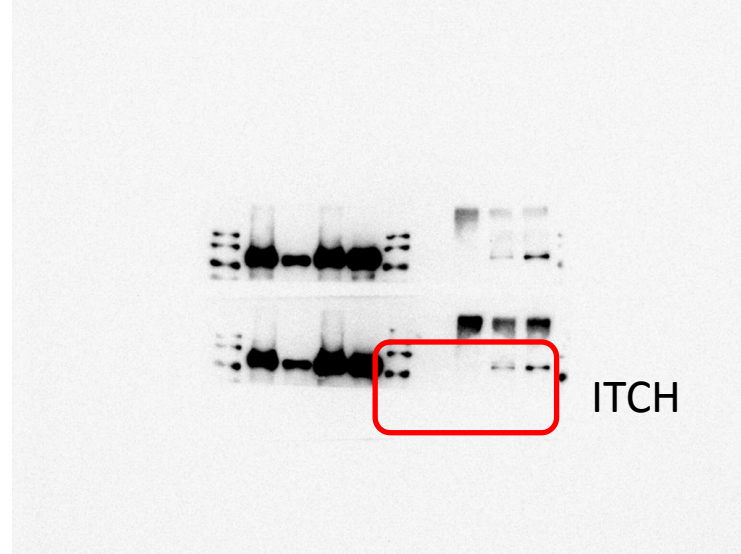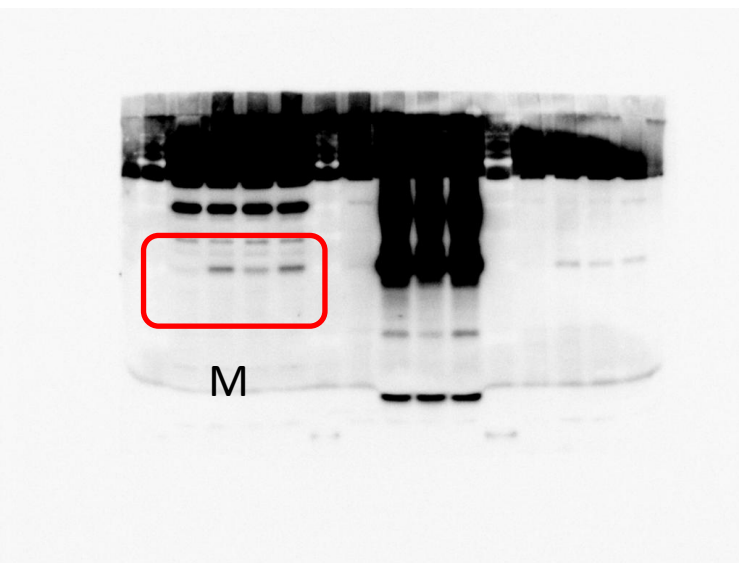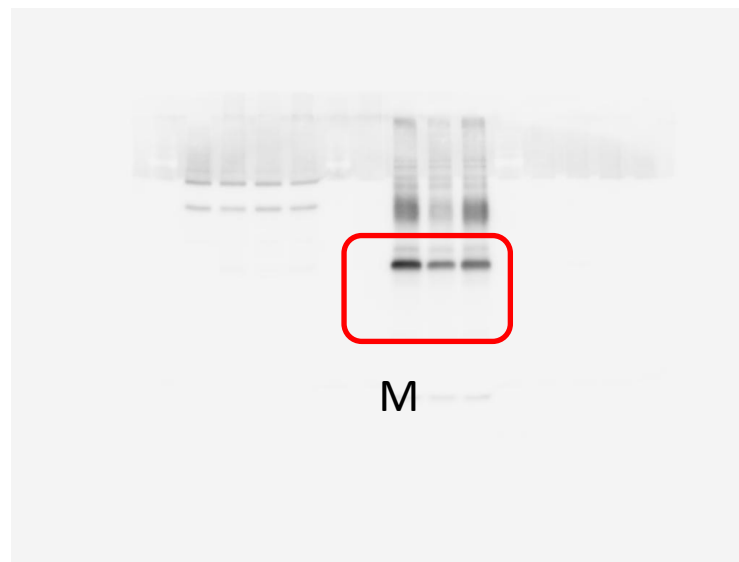

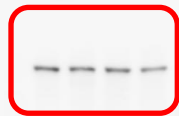

gapdh

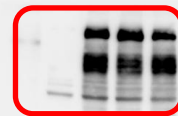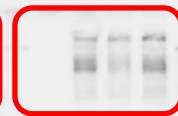

spike

Supplement: fig2-data1 [file Figure 2D.pdf › Figure 2D.pdf]

2E

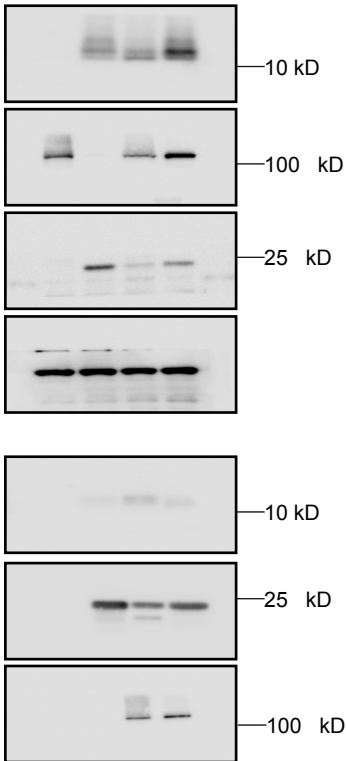

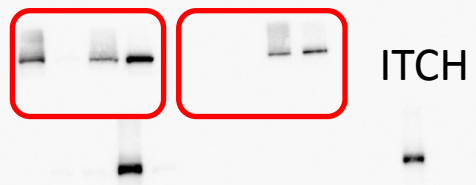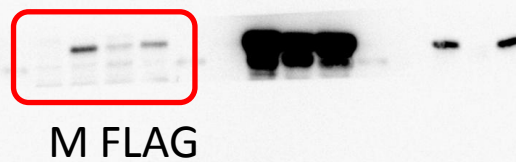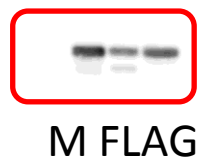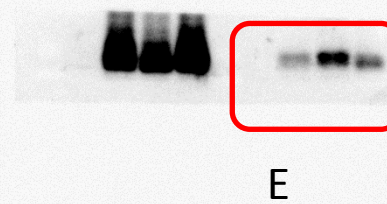

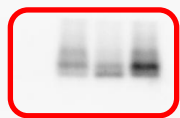

E

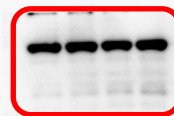

gapdh

Supplement: fig2-data1 [file Figure 2E.pdf › Figure 2E.pdf]

2F

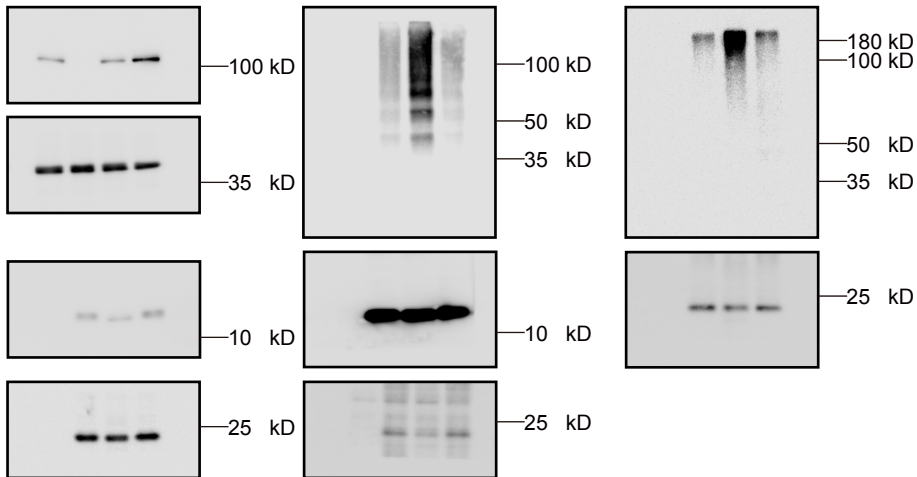

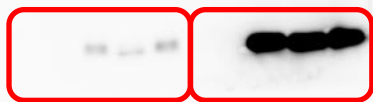

E

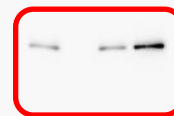

ITCH

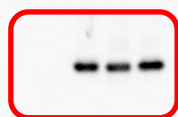

M input

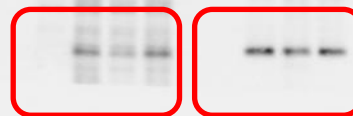

M 1 2 IP

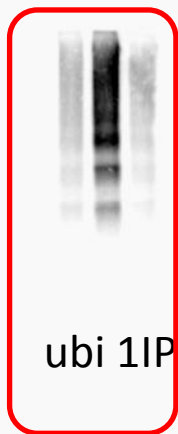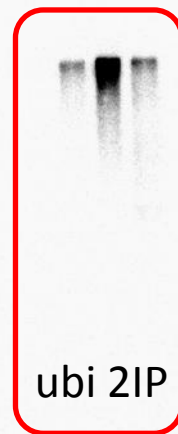

Supplement: fig2-data1 [file Figure 2F.pdf › Figure 2F.pdf]

3C

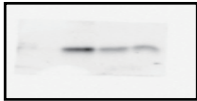

10 kD

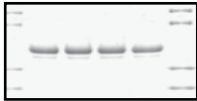

100 kD

55 kD

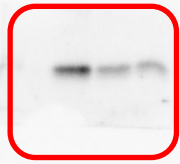

E

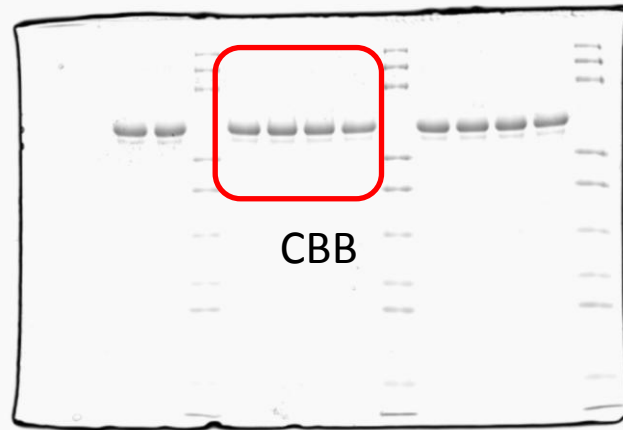

CBB

Supplement: fig3-data1 [file Figure 3A.pdf › Figure 3A.pdf]

3B

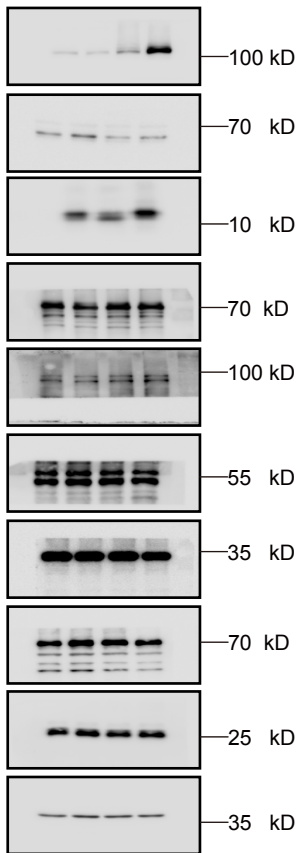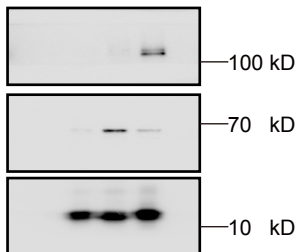

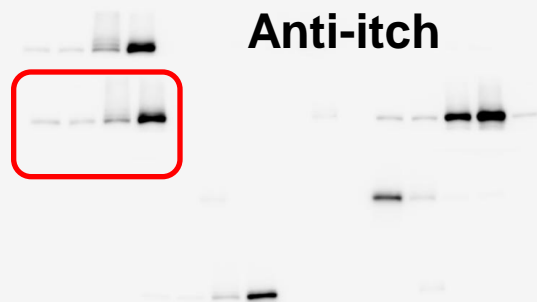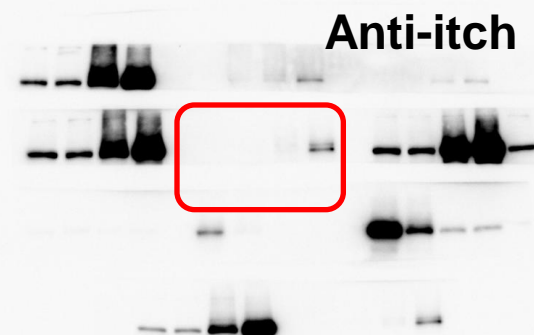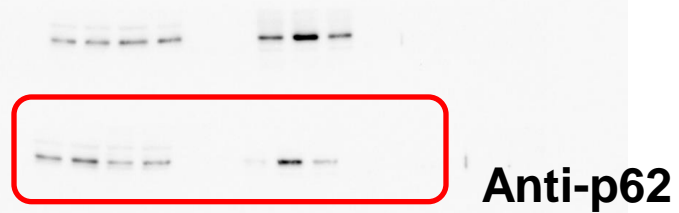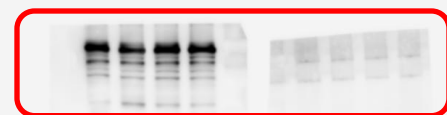

**Anti-FAM134B**

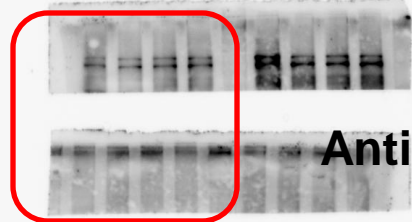

**Anti-NBR1**

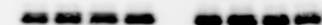

**Anti-RTN3**

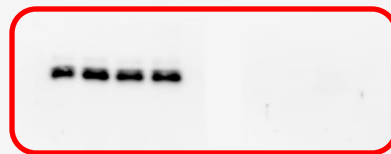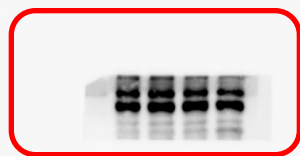

**Anti-NDP52**

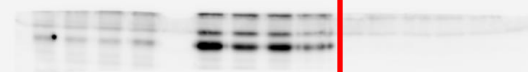

**Anti-NDP52**

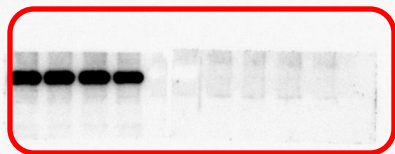

**Anti-NIX**

**Anti-Flag**

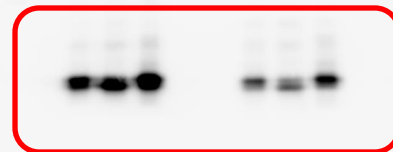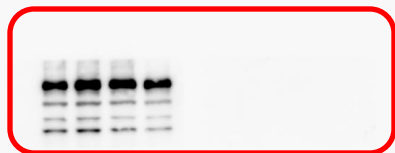

**Anti-OPTN**

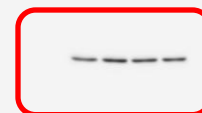

**Anti-GADPH**

Supplement: fig3-data1 [file Figure 3B.pdf › Figure 3B.pdf]

3C

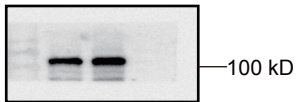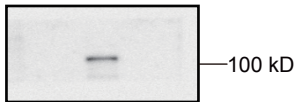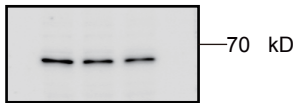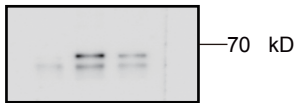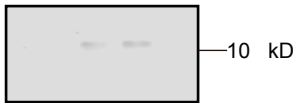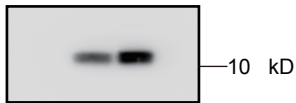

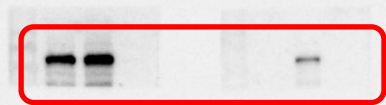

ITCH

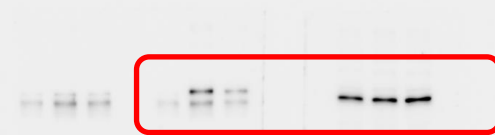

p62

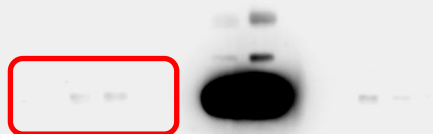

E

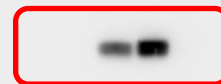

E

Supplement: fig3-data1 [file Figure 3C.pdf › Figure 3C.pdf]

3F

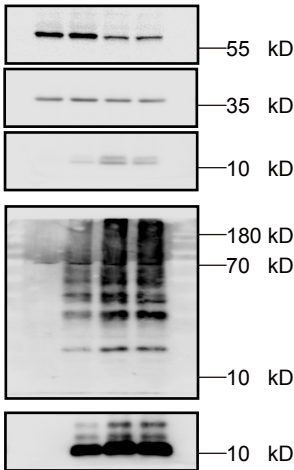

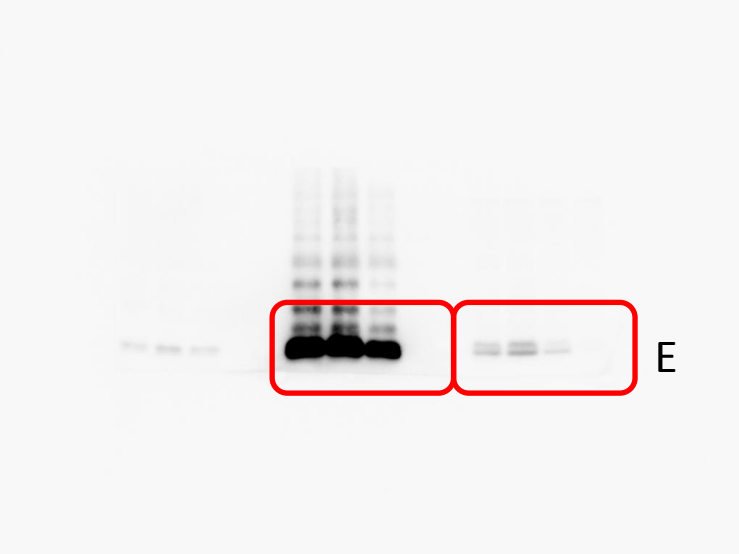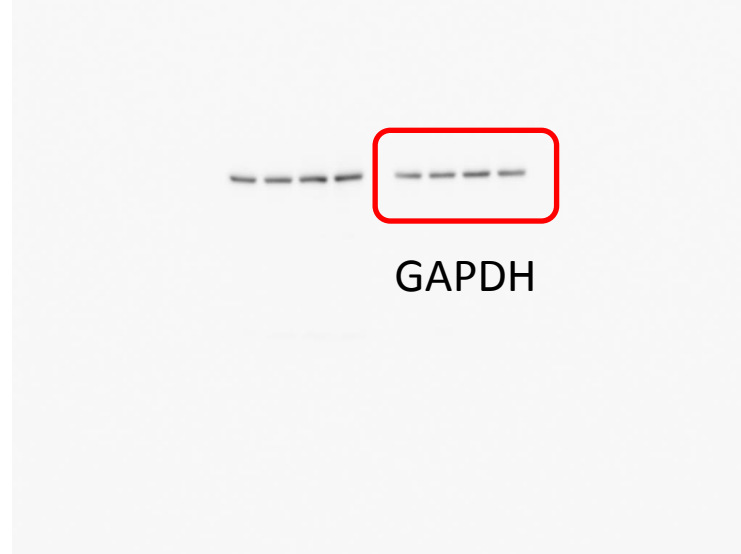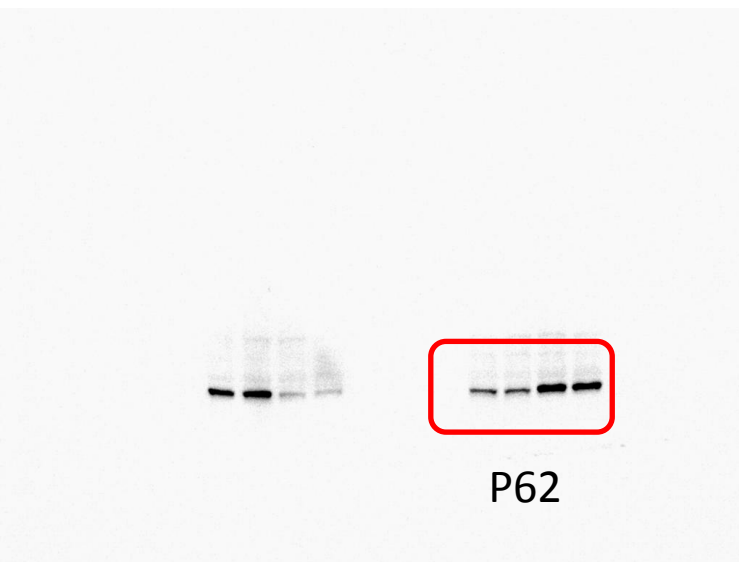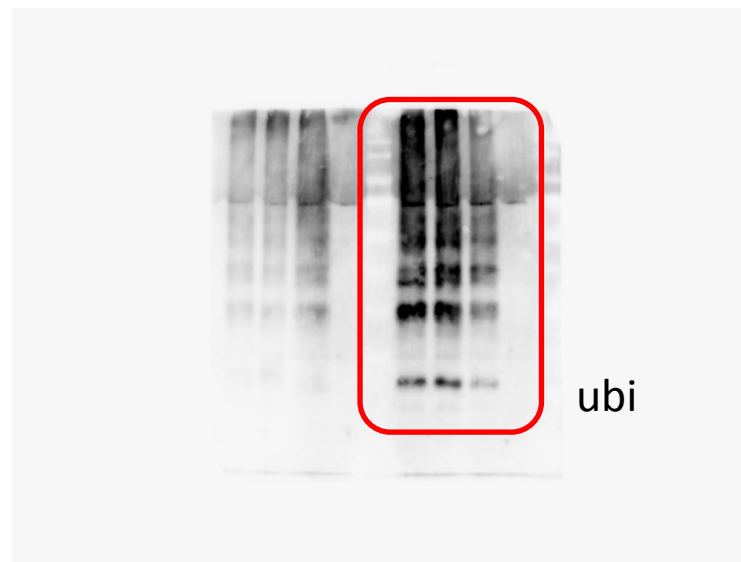

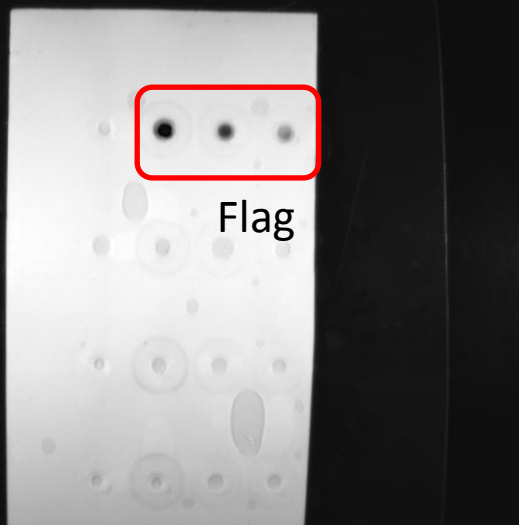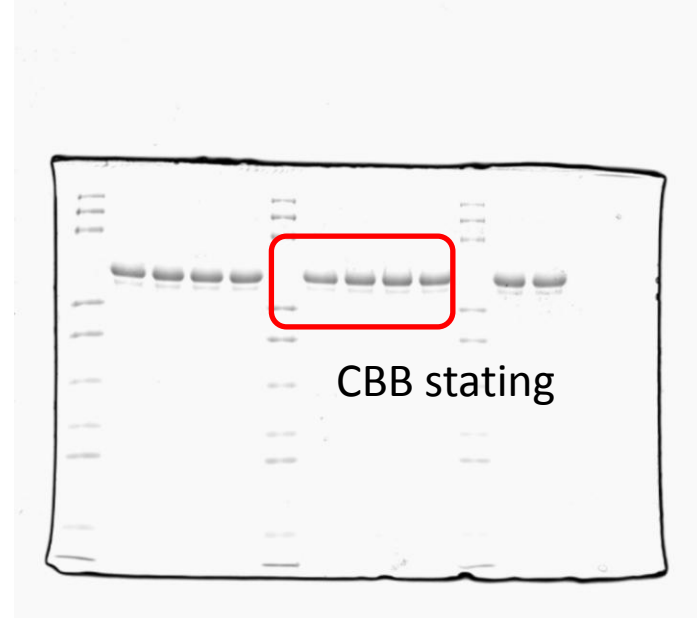

Supplement: fig3-data1 [file Figure 3F.pdf › Figure 3F.pdf]

3G

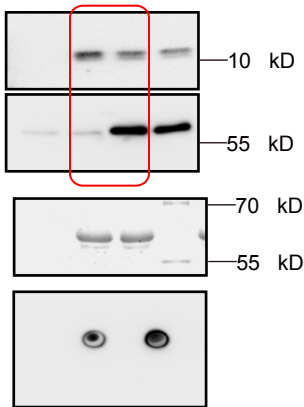

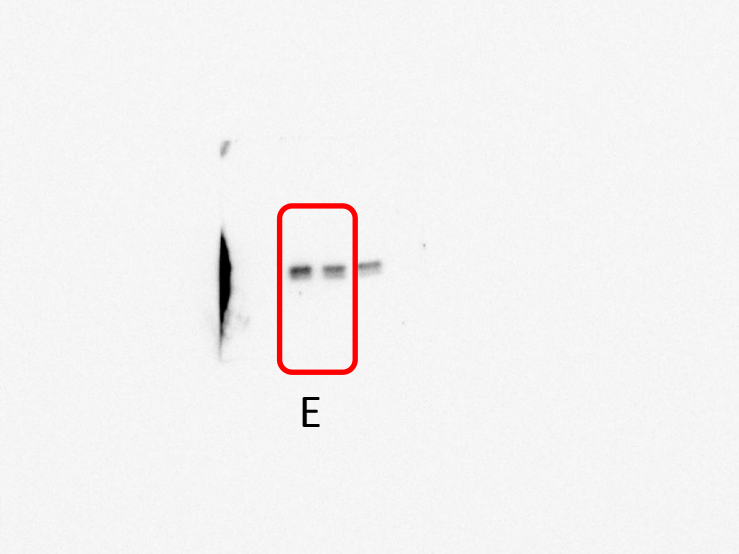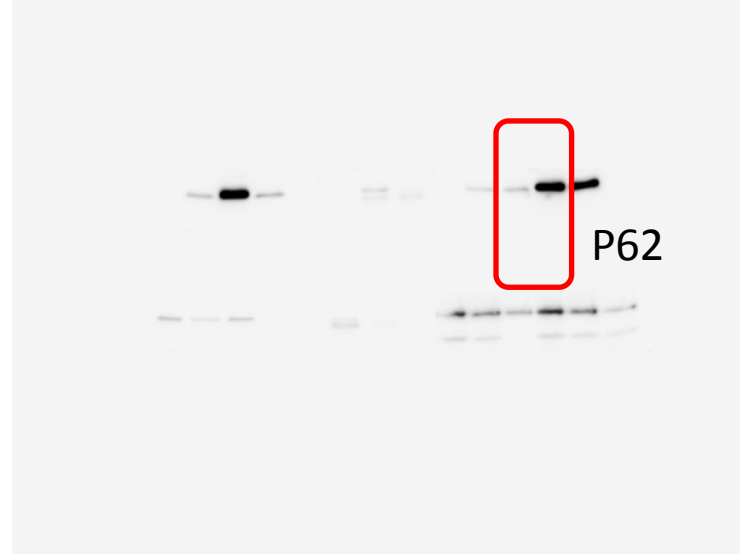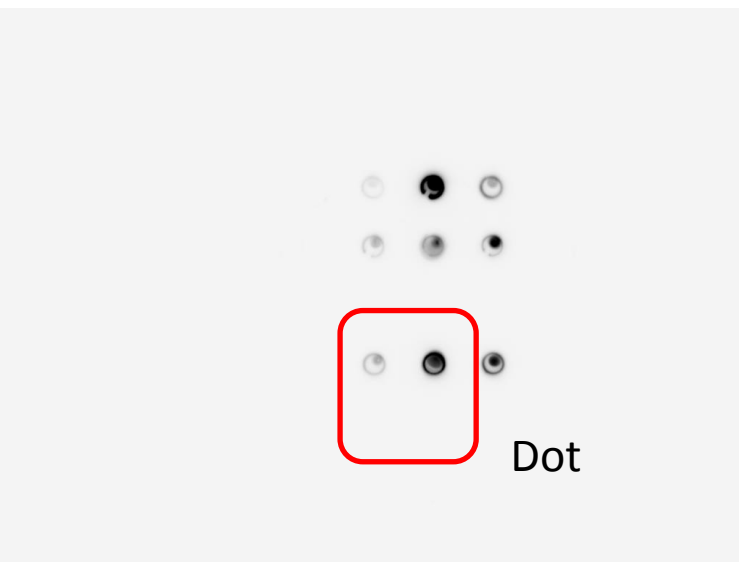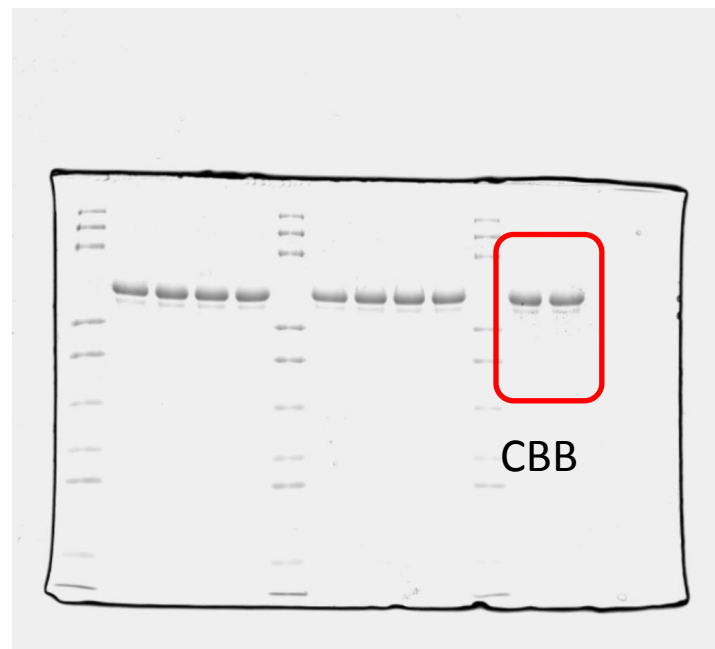

Supplement: fig3-data1 [file Figure 3G.pdf › Figure 3G.pdf]

3H

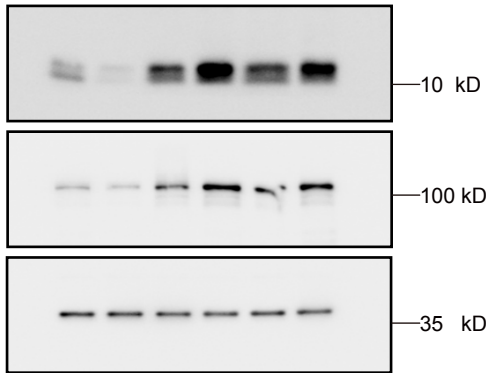

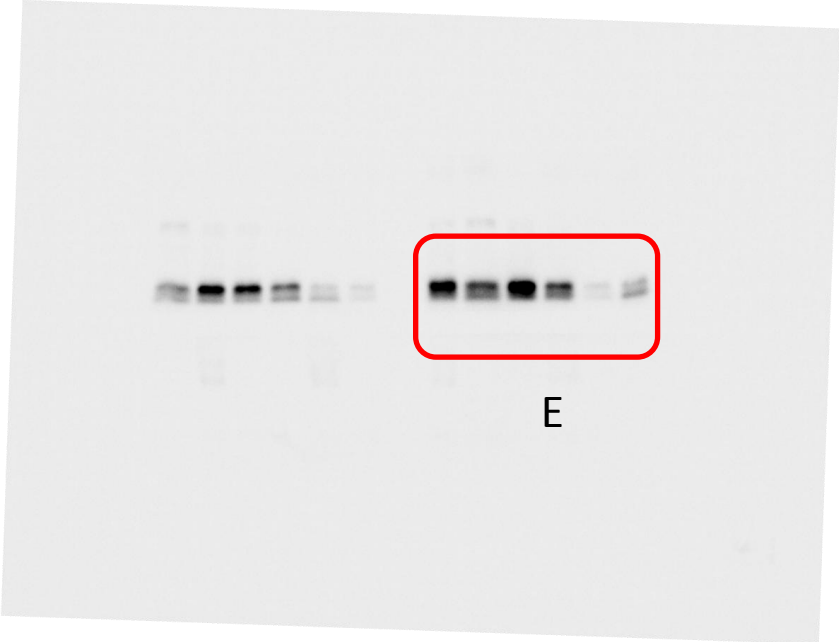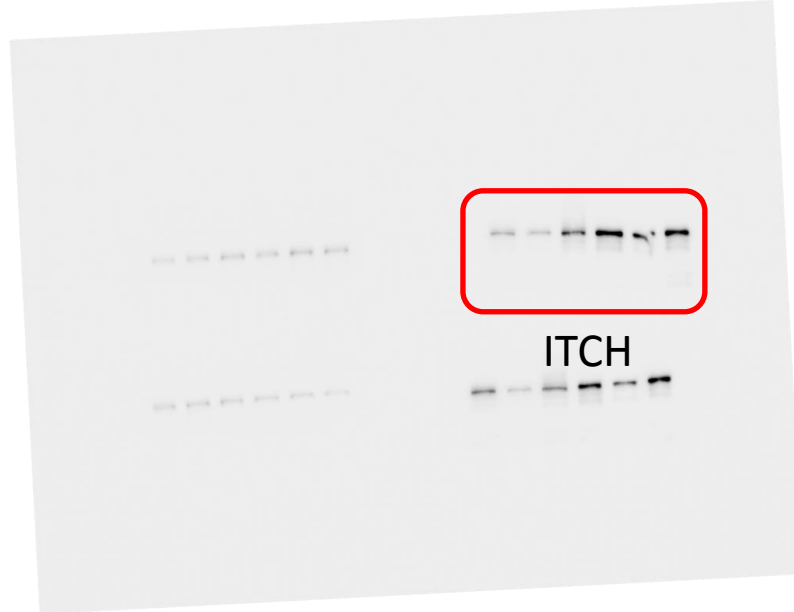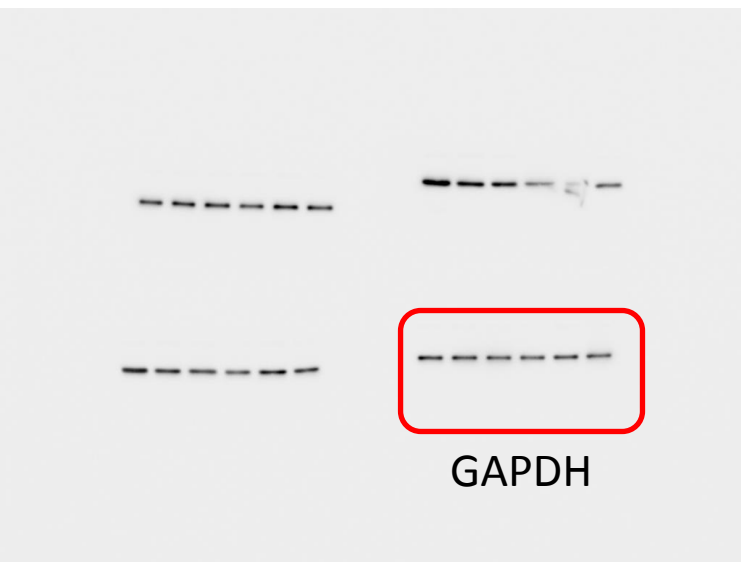

Supplement: fig3-data1 [file Figure 3H.pdf › Figure 3H.pdf]

# S3A

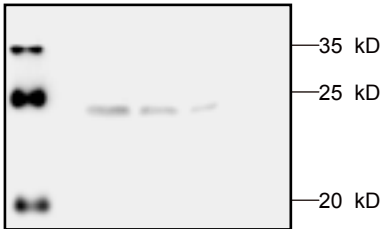

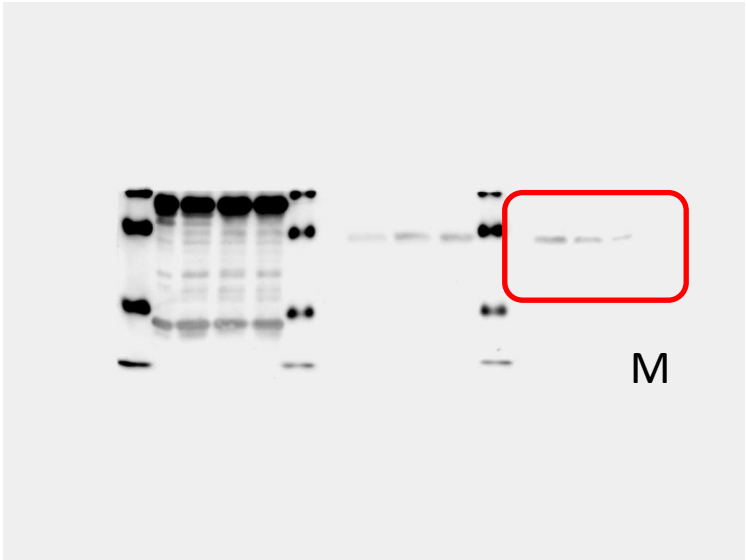

Supplement: fig3-figsupp1-data1 [file Figure 3-figure supplement 1A.pdf › Figure 3-figure supplement 1A.pdf]

# S3H

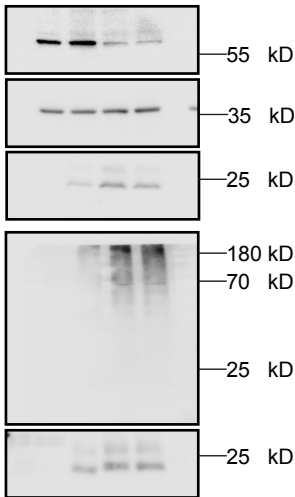

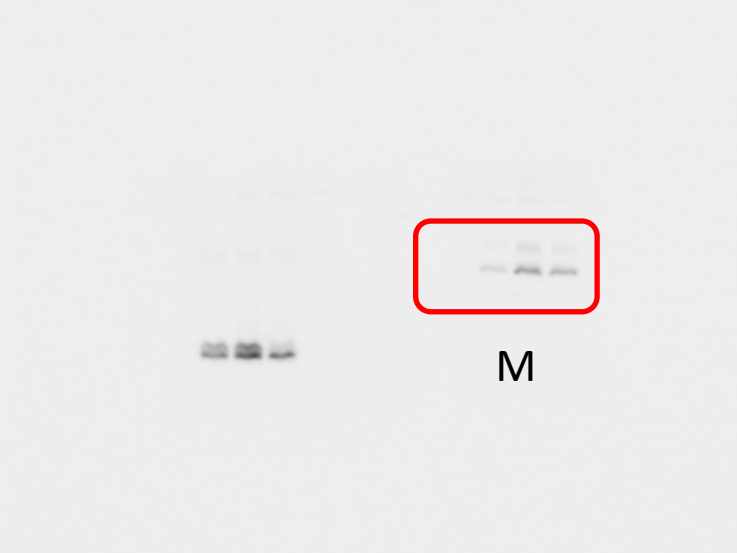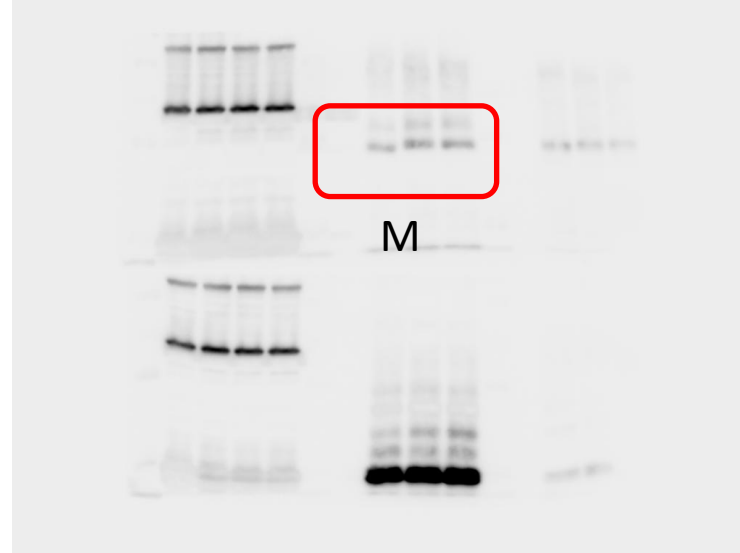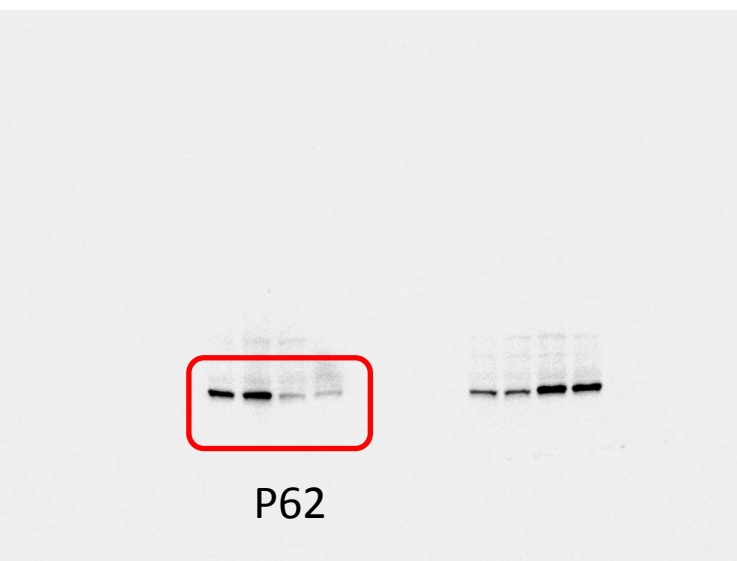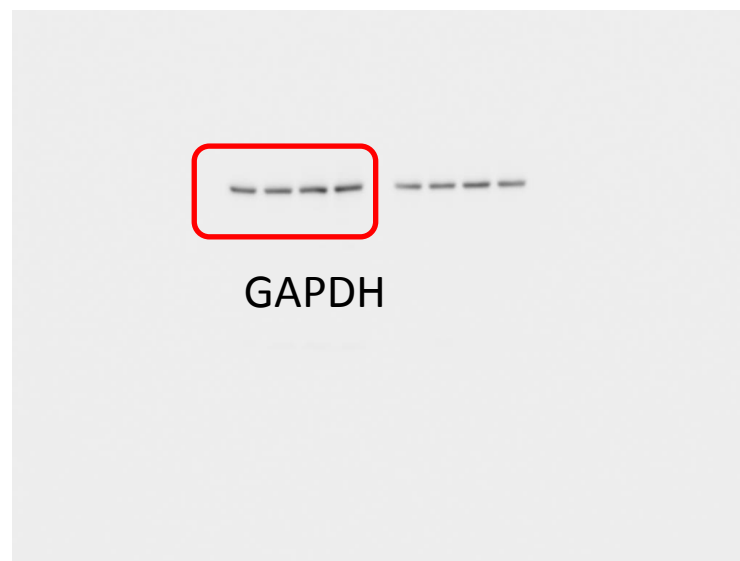

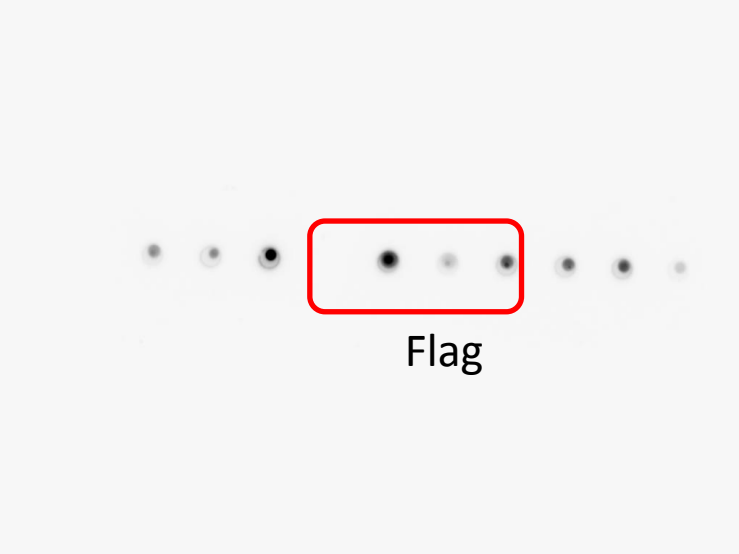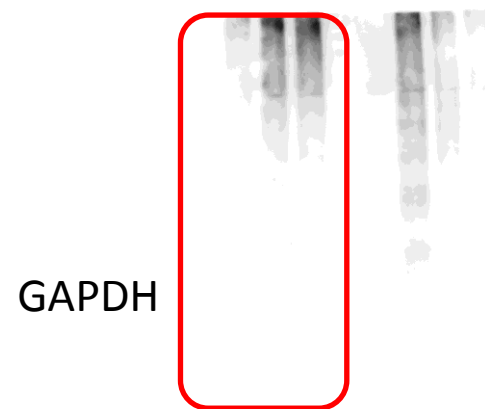

Supplement: fig3-figsupp1-data1 [file Figure 3-figure supplement 1H.pdf › Figure 3-figure supplement 1H.pdf]

S3I

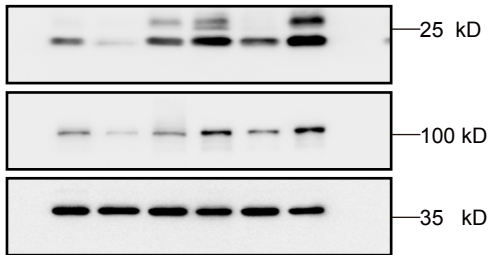

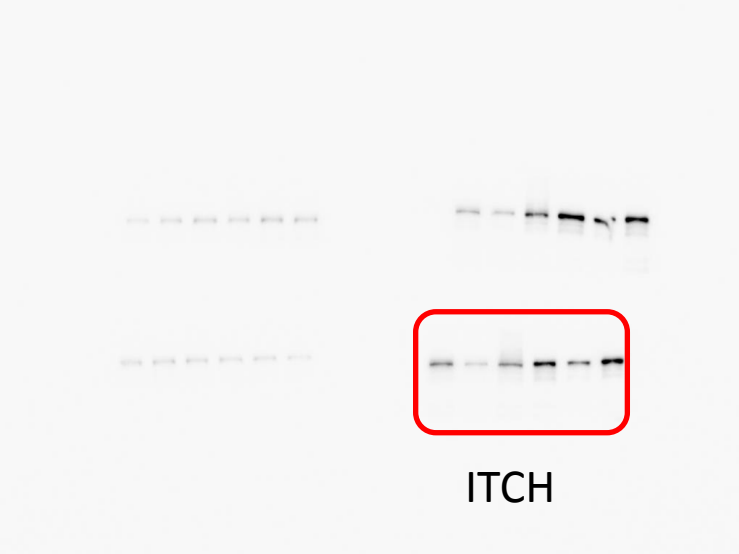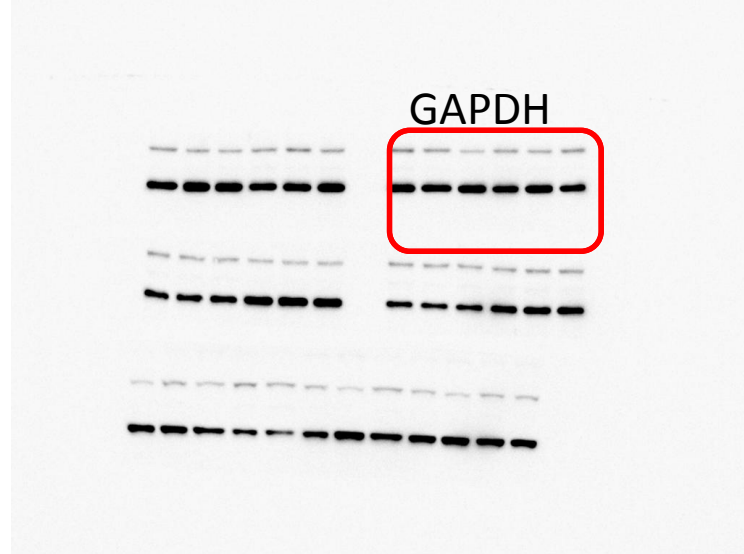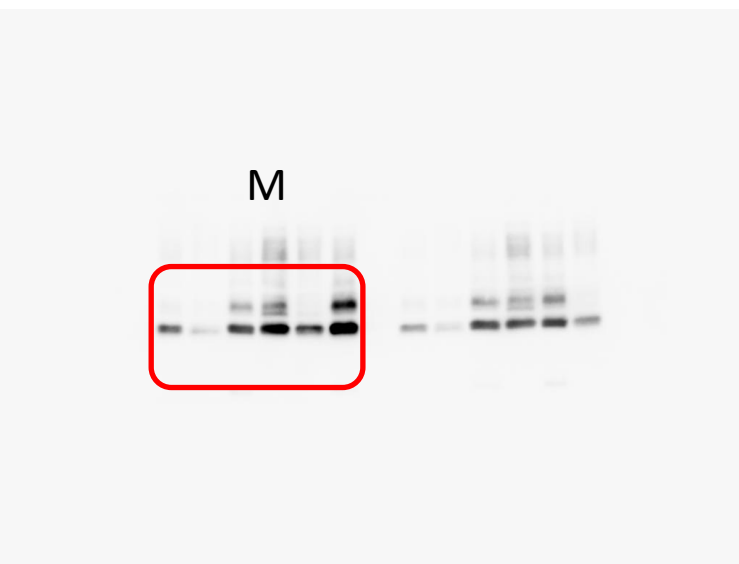

Supplement: fig3-figsupp1-data1 [file Figure 3-figure supplement 1I.pdf › Figure 3-figure supplement 1I.pdf]

4A

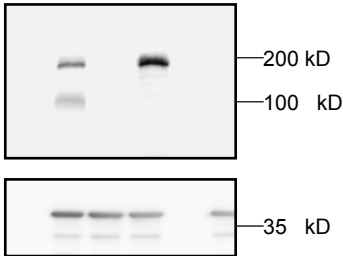

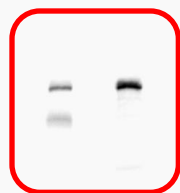

**Spike**

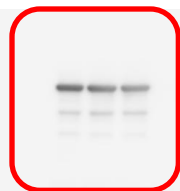

**GAPDH**

Supplement: fig4-data1 [file Figure 4A.pdf › Figure 4A.pdf]

4B

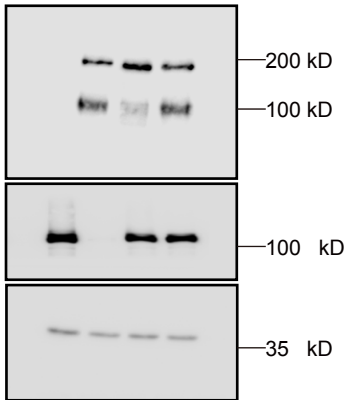

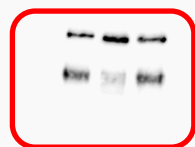

Flag spike

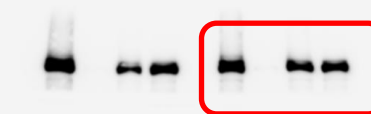

ITCH

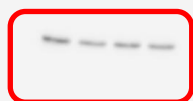

gapdh

Supplement: fig4-data1 [file Figure 4B.pdf › Figure 4B.pdf]

4C

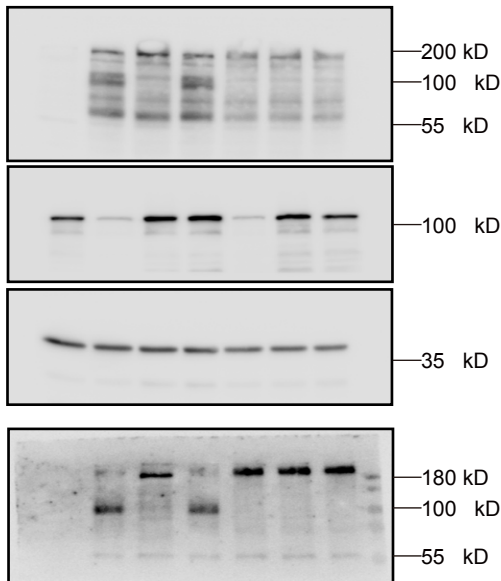

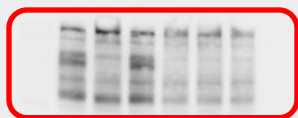

**Spike**

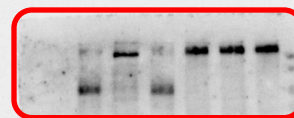

**Spike**

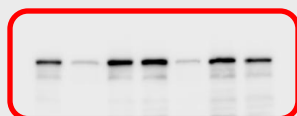

**ITCH**

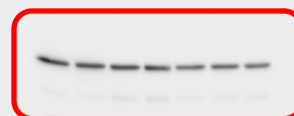

**GAPDH**

Supplement: fig4-data1 [file Figure 4C.pdf › Figure 4C.pdf]

# S4A

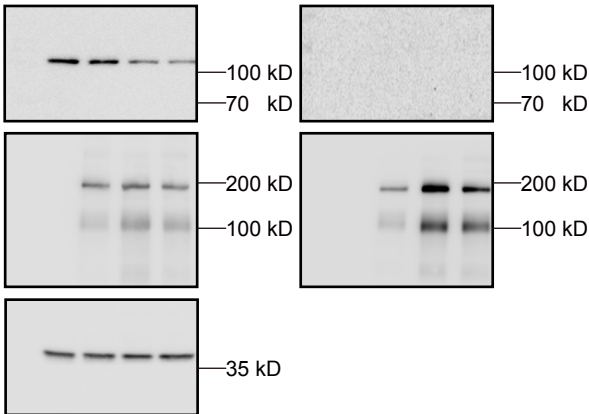

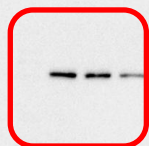

**ITCH**

**ITCH**

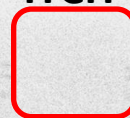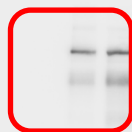

**spike**

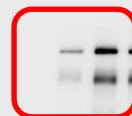

**spike**

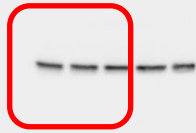

**GAPDH**

Supplement: fig4-figsupp1-data1 [file Figure 4-figure supplement 1A.pdf › Figure 4-figure supplement 1A.pdf]

S5A

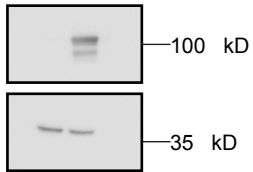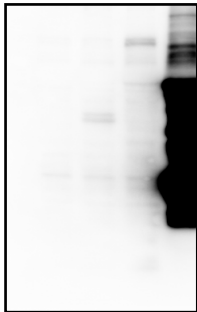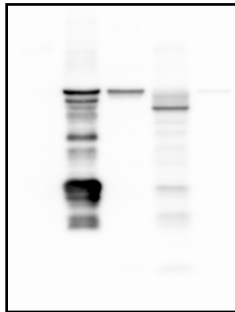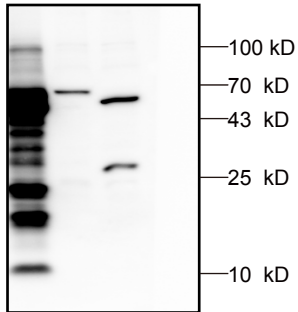

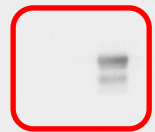

S tag

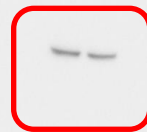

gapdh

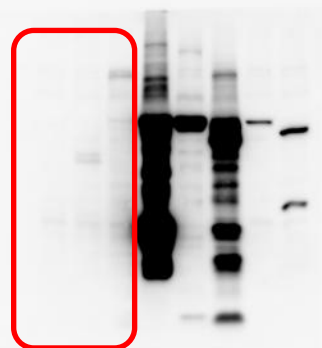

Flag

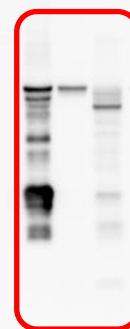

Flag

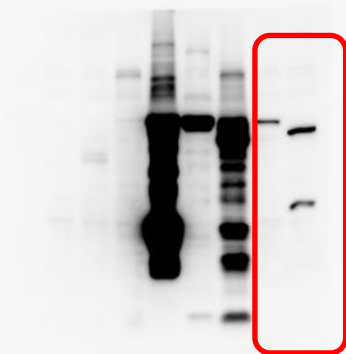

Flag

Supplement: fig4-figsupp2-data1 [file Figure 4-figure supplement 2A.pdf › Figure 4-figure supplement 2A.pdf]

S6A

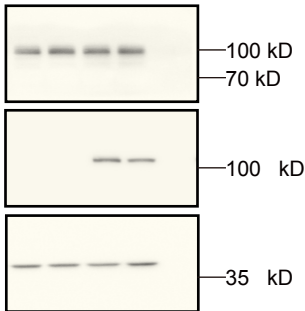

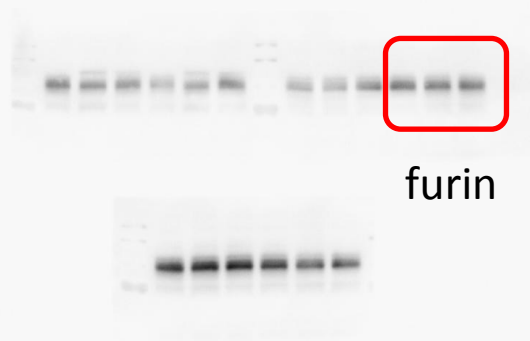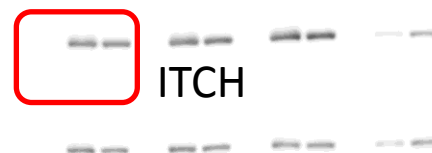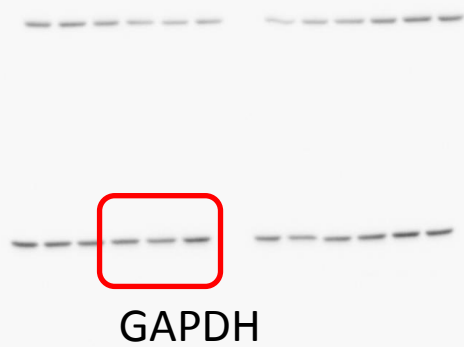

Supplement: fig4-figsupp3-data1 [file Figure 4-figure supplement 3A.pdf › Figure 4-figure supplement 3A.pdf]

S6B

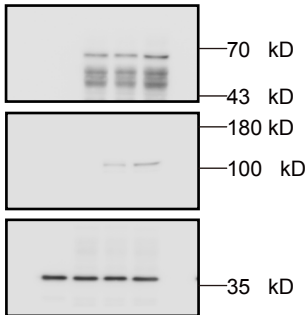

TMPRSS2

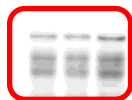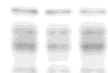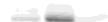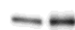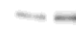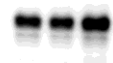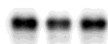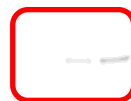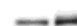

ITCH

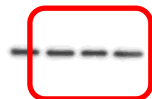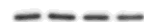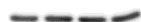

GAPDH

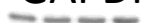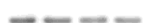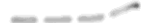

Supplement: fig4-figsupp3-data1 [file Figure 4-figure supplement 3B.pdf › Figure 4-figure supplement 3B.pdf]

# S6C

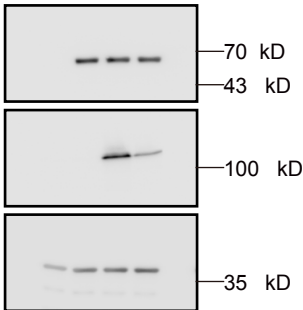

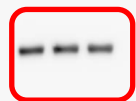

tmprss4

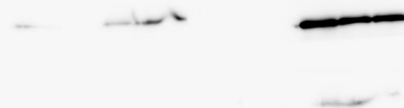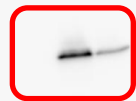

ITCH

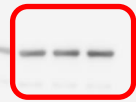

GAPDH

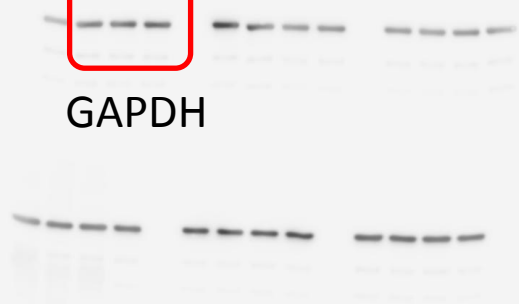

Supplement: fig4-figsupp3-data1 [file Figure 4-figure supplement 3C.pdf › Figure 4-figure supplement 3C.pdf]

# S6D

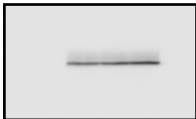

— 55 kD

— 43 kD

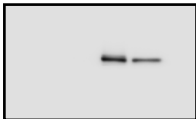

— 100 kD

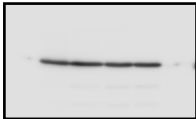

— 35 kD

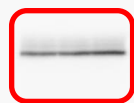

tmpr11d

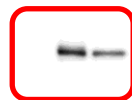

ITCH

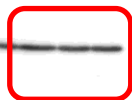

GAPDH

Supplement: fig4-figsupp3-data1 [file Figure 4-figure supplement 3D.pdf › Figure 4-figure supplement 3D.pdf]

# S6E

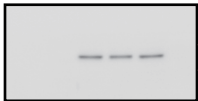

— 70 kD

— 55 kD

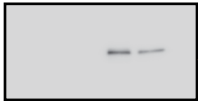

— 100 kD

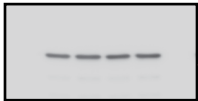

— 35 kD

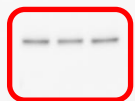

ACR

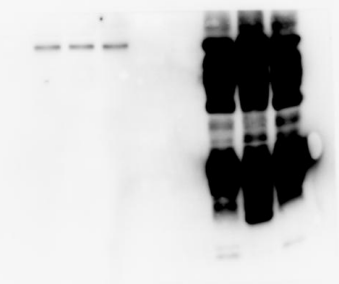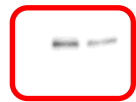

ITCH

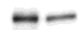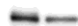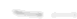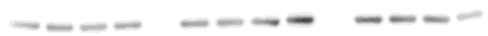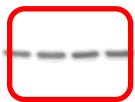

GAPDH

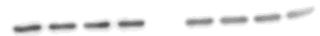

Supplement: fig4-figsupp3-data1 [file Figure 4-figure supplement 3E.pdf › Figure 4-figure supplement 3E.pdf]

# S6F

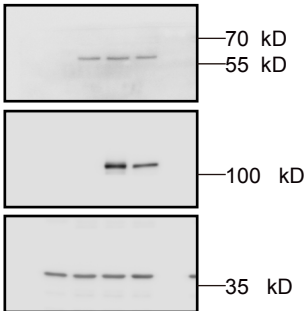

PLAT

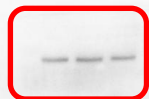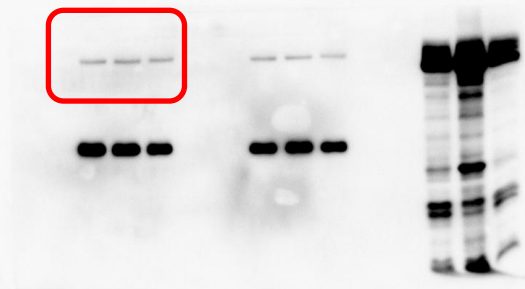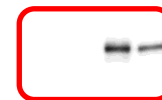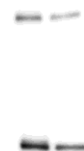

ITCH

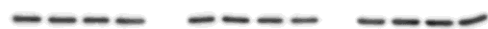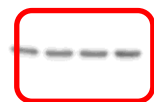

GAPDH

Supplement: fig4-figsupp3-data1 [file Figure 4-figure supplement 3F.pdf › Figure 4-figure supplement 3F.pdf]

S6H

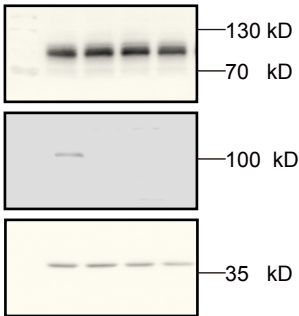

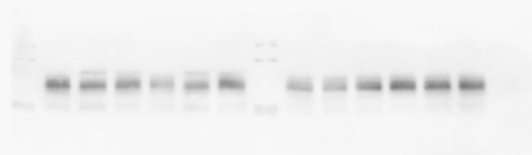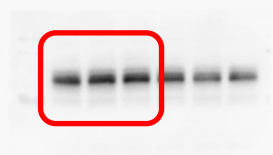

furin

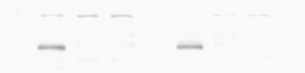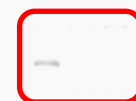

ITCH

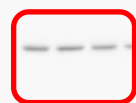

GAPDH

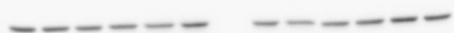

Supplement: fig4-figsupp3-data1 [file Figure 4-figure supplement 3H.pdf › Figure 4-figure supplement 3H.pdf]

S6I

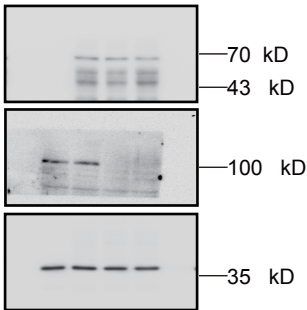

TMPRSS2

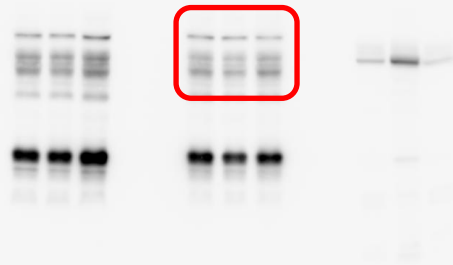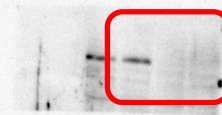

ITCH

GAPDH

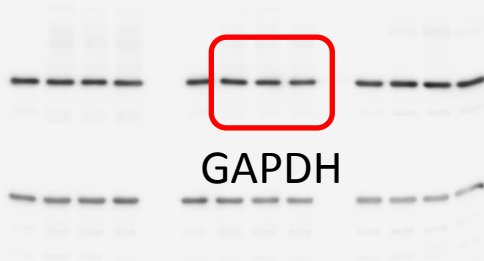

Supplement: fig4-figsupp3-data1 [file Figure 4-figure supplement 3I.pdf › Figure 4-figure supplement 3I.pdf]

S6J

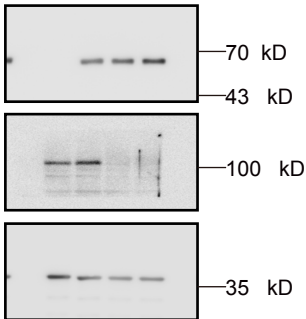

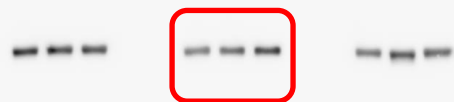

tmprss4

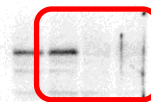

ITCH

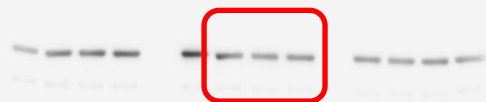

GAPDH

Supplement: fig4-figsupp3-data1 [file Figure 4-figure supplement 3J.pdf › Figure 4-figure supplement 3J.pdf]

# S6K

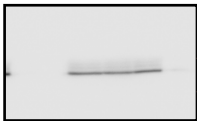

— 55 kD

— 43 kD

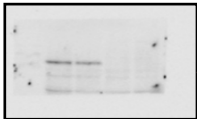

— 100 kD

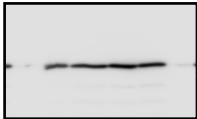

— 35 kD

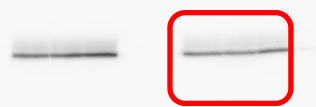

tmpr11d

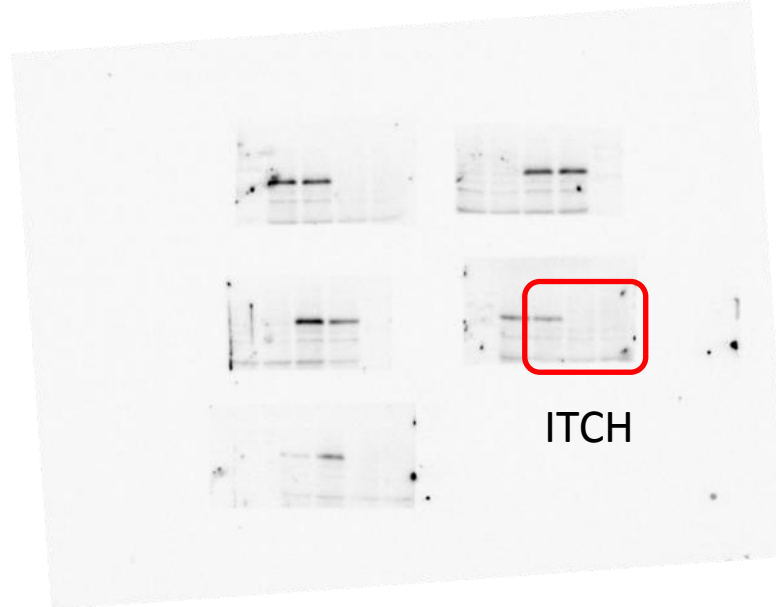

ITCH

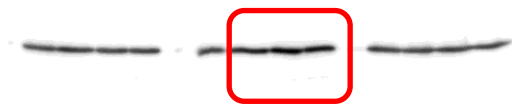

GAPDH

Supplement: fig4-figsupp3-data1 [file Figure 4-figure supplement 3K.pdf › Figure 4-figure supplement 3K.pdf]

# S6L

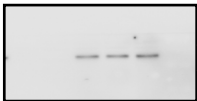

— 70 kD

— 55 kD

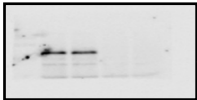

— 100 kD

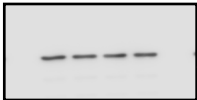

— 35 kD

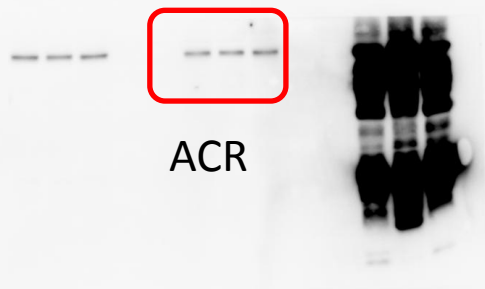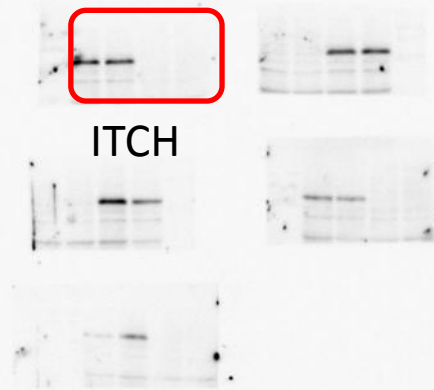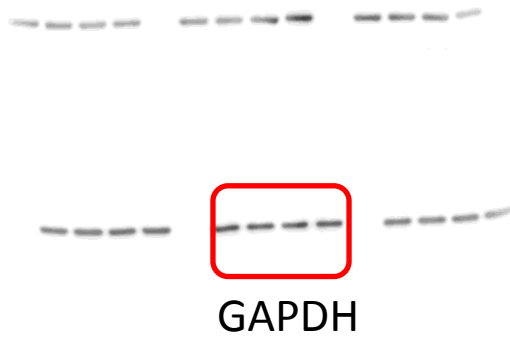

Supplement: fig4-figsupp3-data1 [file Figure 4-figure supplement 3L.pdf › Figure 4-figure supplement 3L.pdf]

S6M

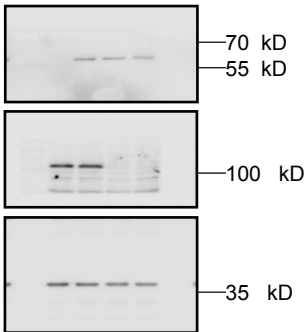

PLAT

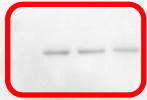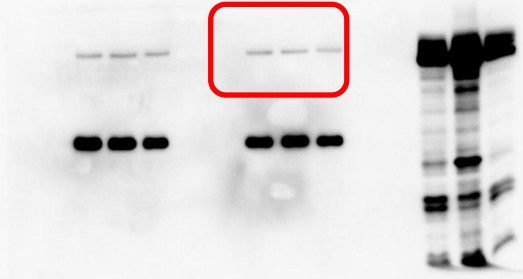

ITCH

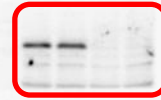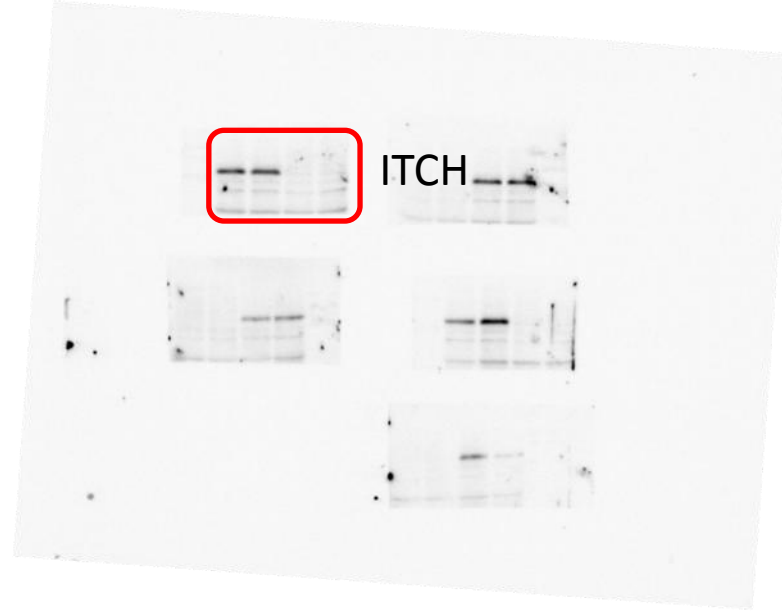

GAPDH

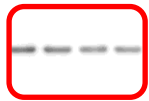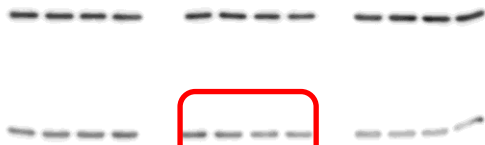

Supplement: fig4-figsupp3-data1 [file Figure 4-figure supplement 3M.pdf › Figure 4-figure supplement 3M.pdf]

S6N

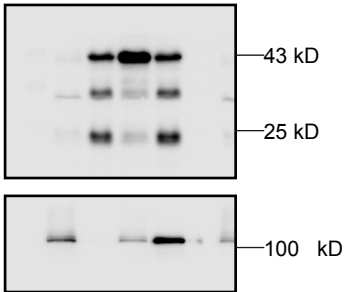

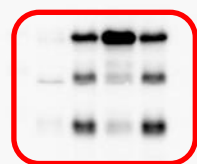

CTSL

ITCH

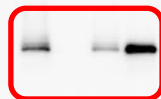

Supplement: fig4-figsupp3-data1 [file Figure 4-figure supplement 3N.pdf › Figure 4-figure supplement 3N.pdf]

# S60

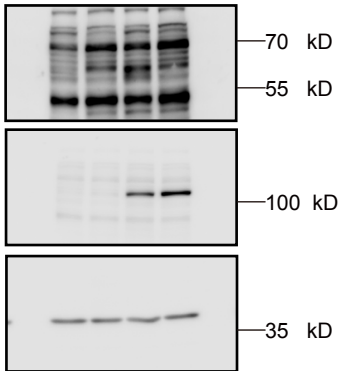

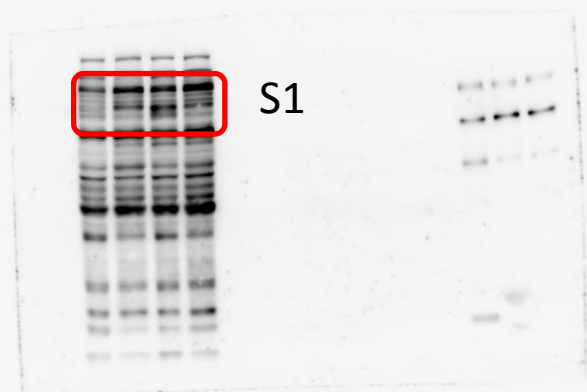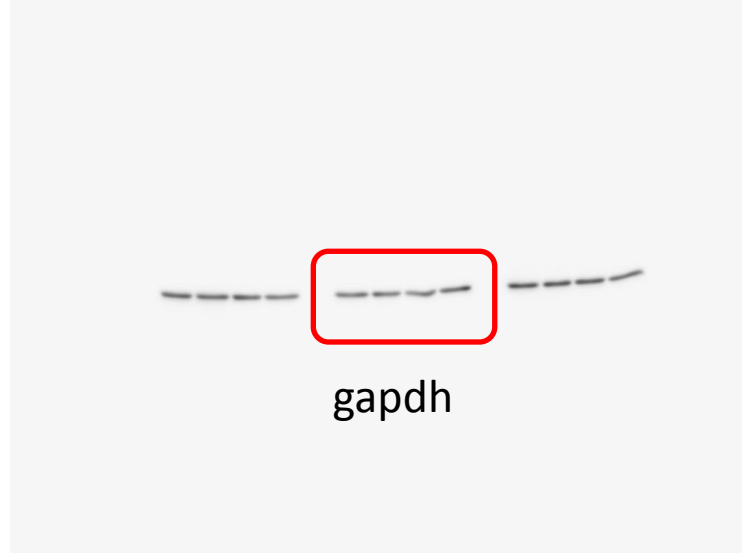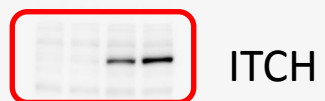

Supplement: fig4-figsupp3-data1 [file Figure 4-figure supplement 3O.pdf › Figure 4-figure supplement 3O.pdf]

5B

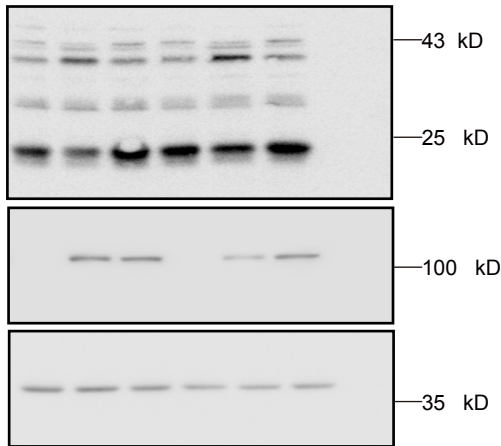

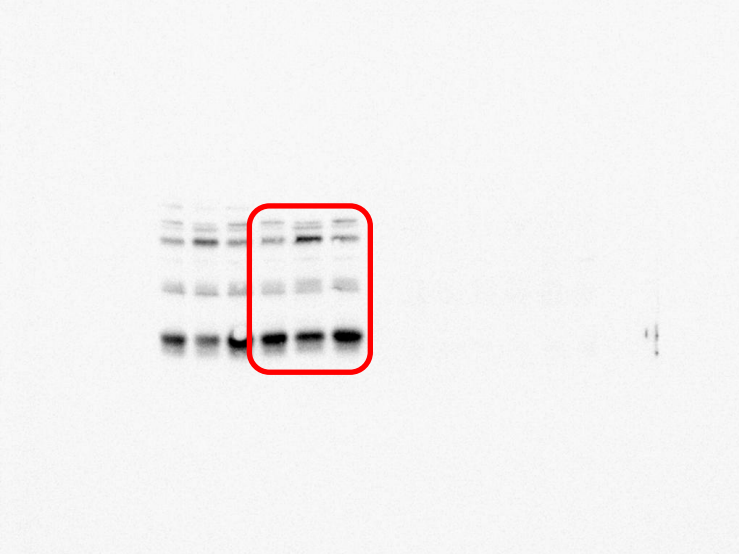

CTSL

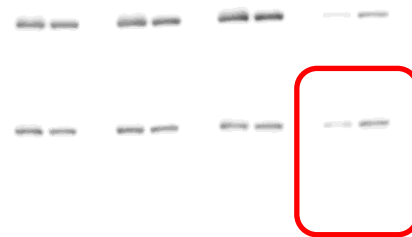

ITCH

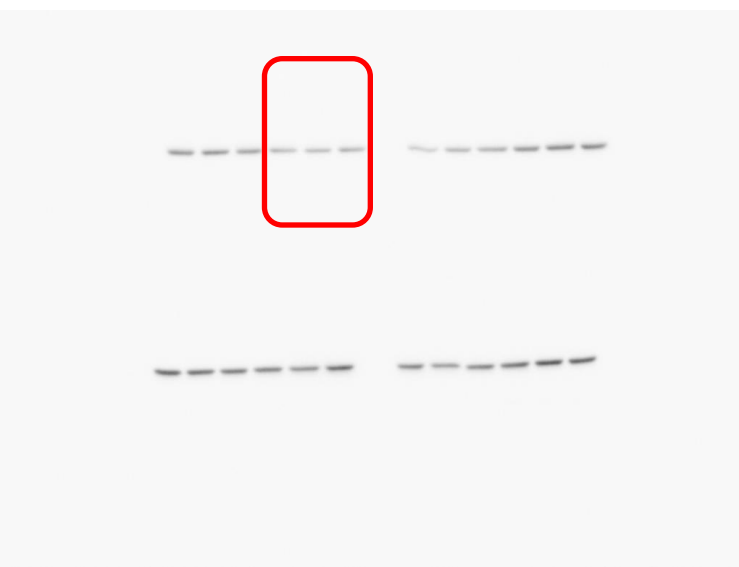

GAPDH

Supplement: fig5-data1 [file Figure 5B.pdf › Figure 5B.pdf]

5C

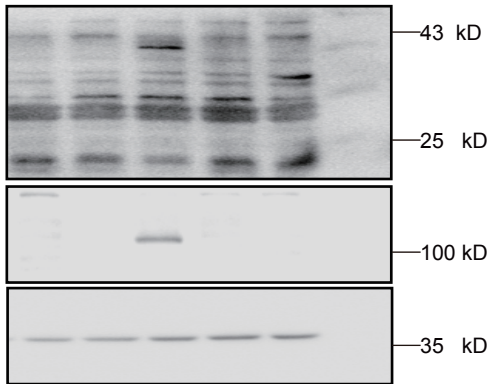

CTSL

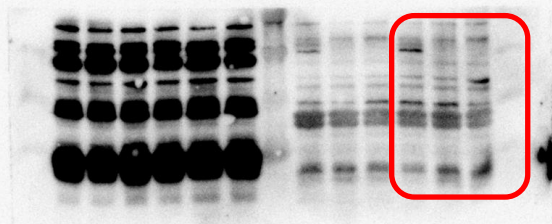

ITCH

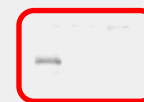

gapdh

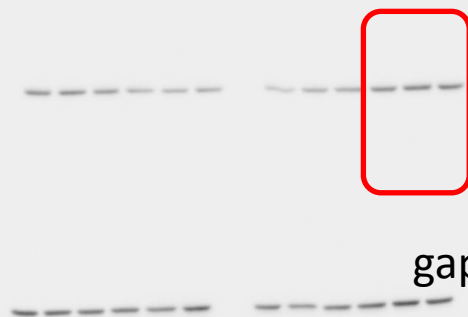

Supplement: fig5-data1 [file Figure 5C.pdf › Figure 5C.pdf]

5D

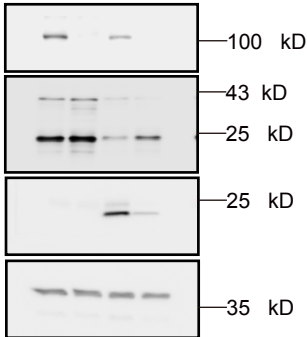

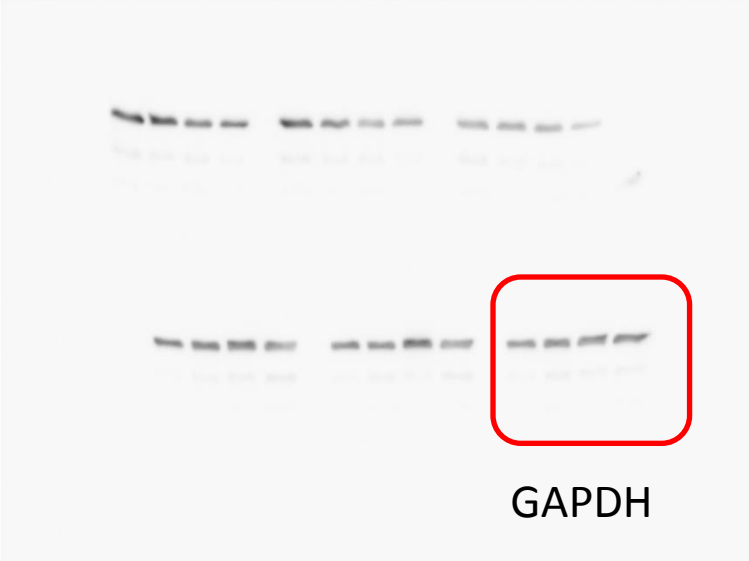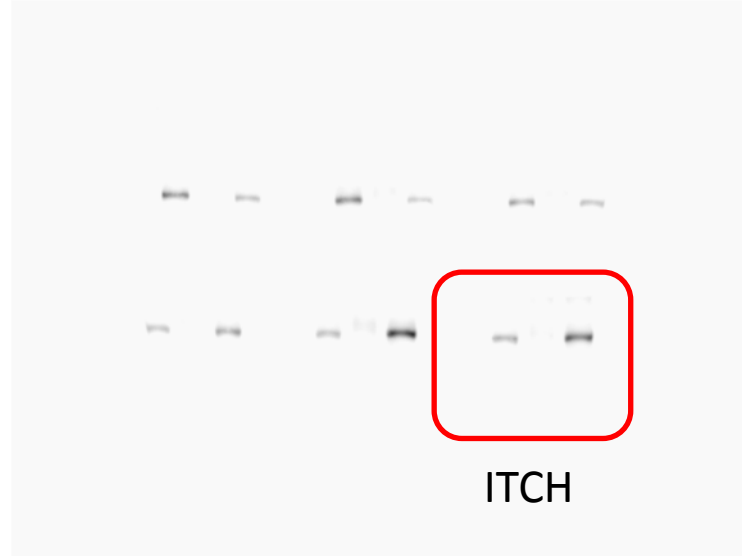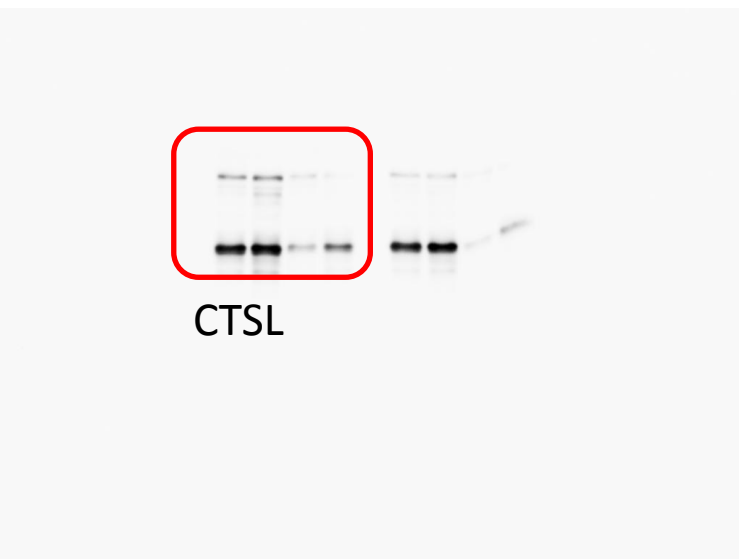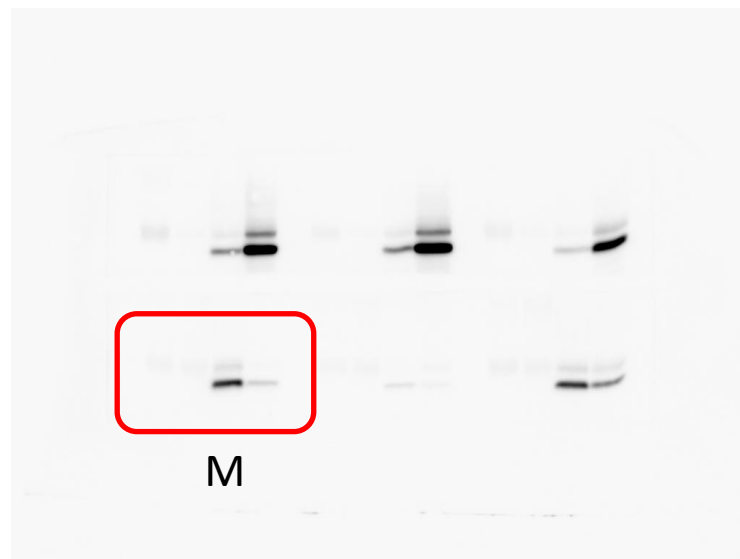

Supplement: fig5-data1 [file Figure 5D.pdf › Figure 5D.pdf]

5E

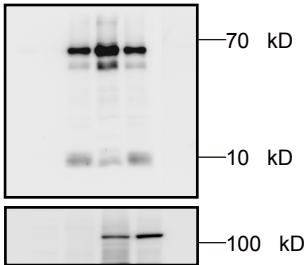

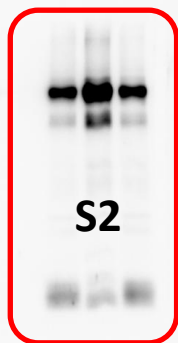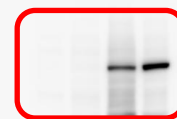

Supplement: fig5-data1 [file Figure 5E.pdf › Figure 5E.pdf]

5F

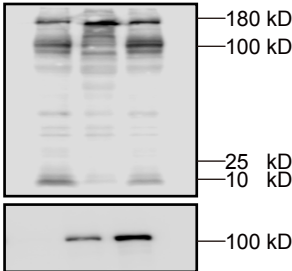

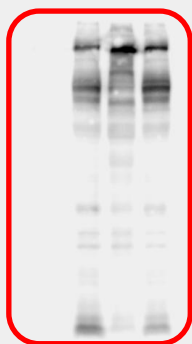

Spike

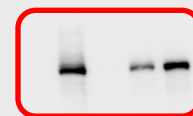

ITCH

Supplement: fig5-data1 [file Figure 5F.pdf › Figure 5F.pdf]

5G

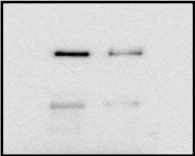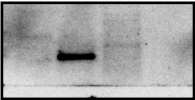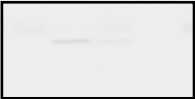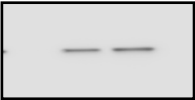

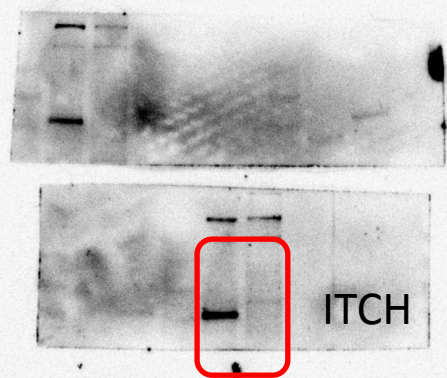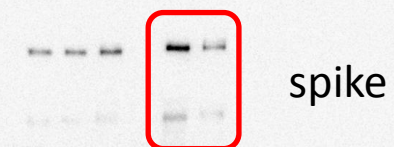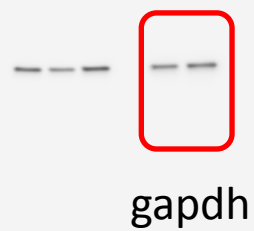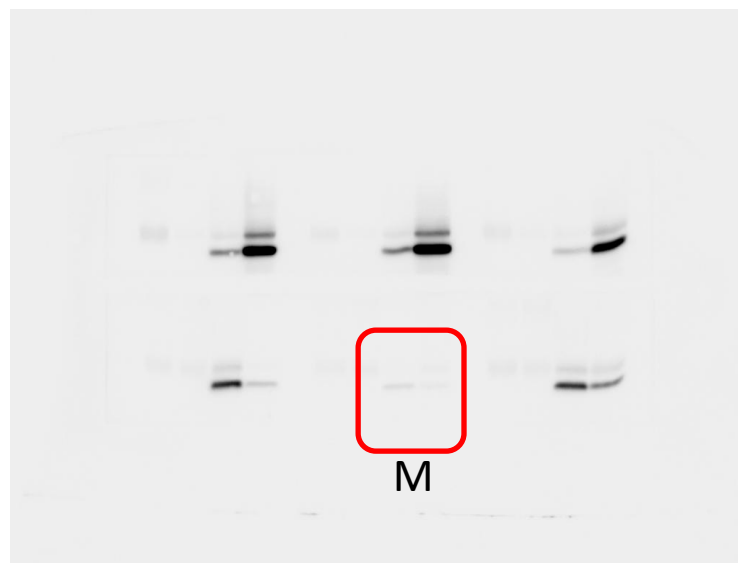

Supplement: fig5-data1 [file Figure 5G.pdf › Figure 5G.pdf]

6C

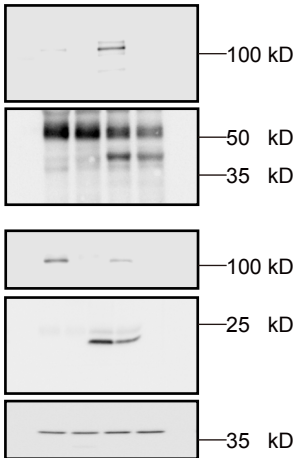

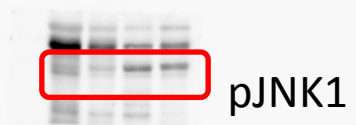

pJNK1

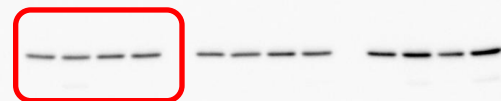

GAPDH

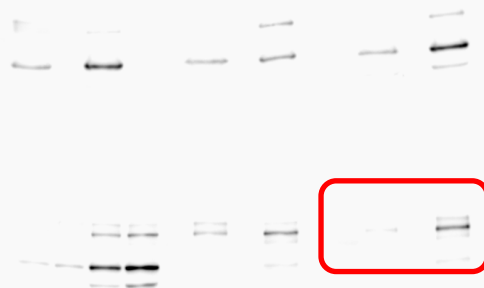

p-ITCH

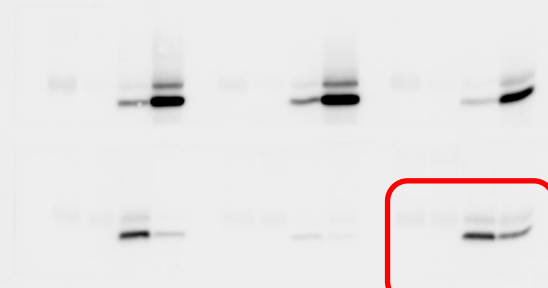

M

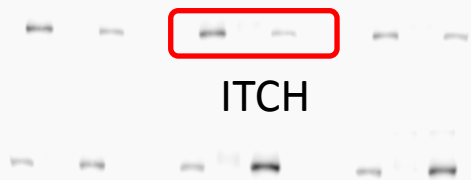

ITCH

Supplement: fig6-data1 [file Figure 6C.pdf › Figure 6C.pdf]

6F

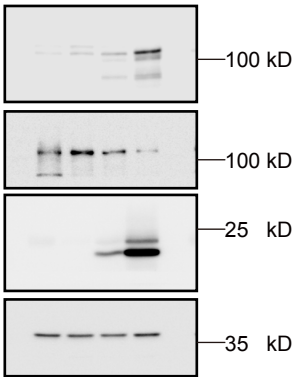

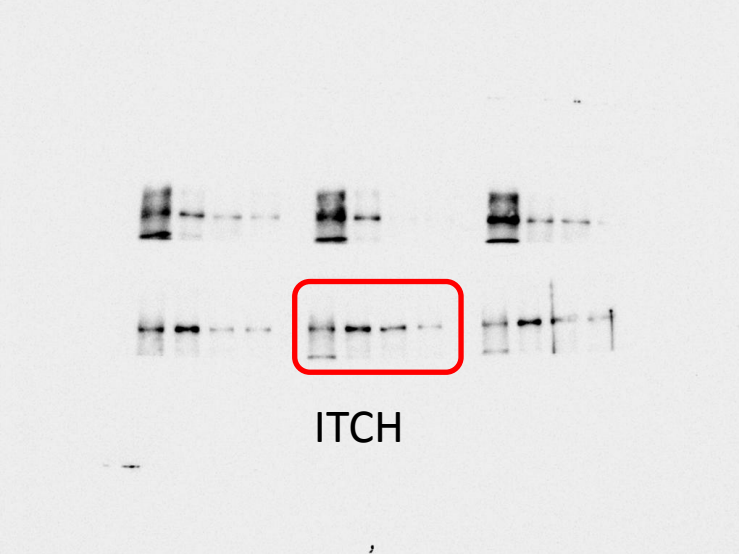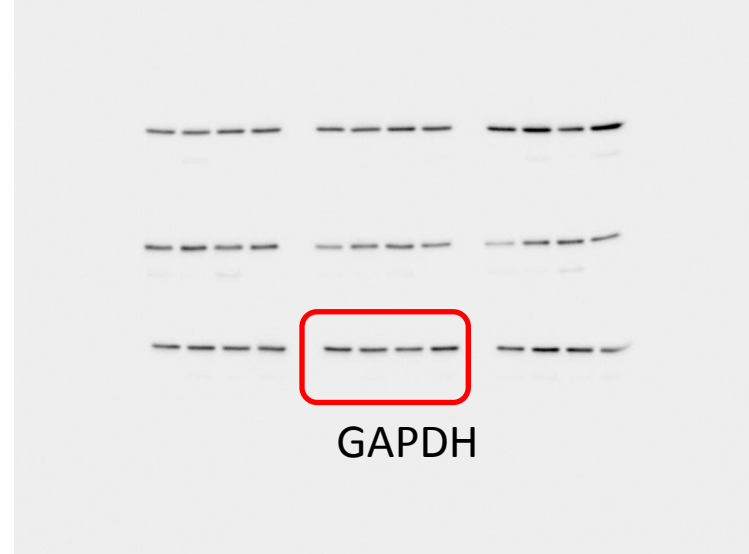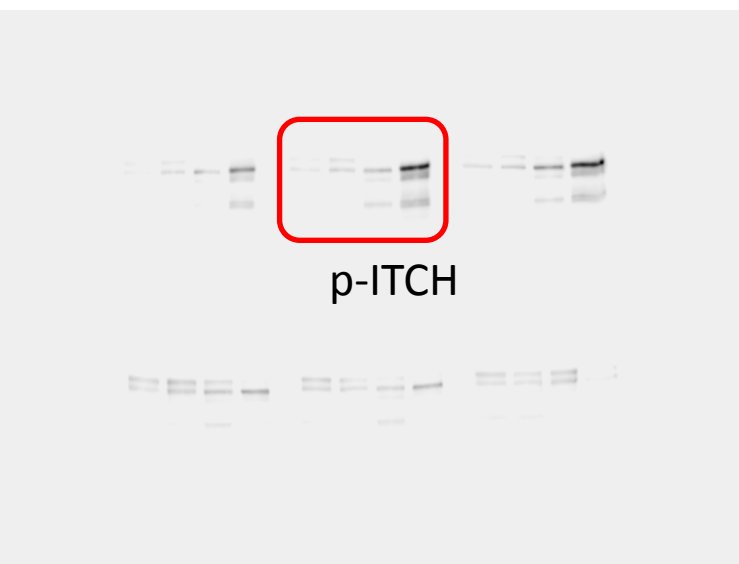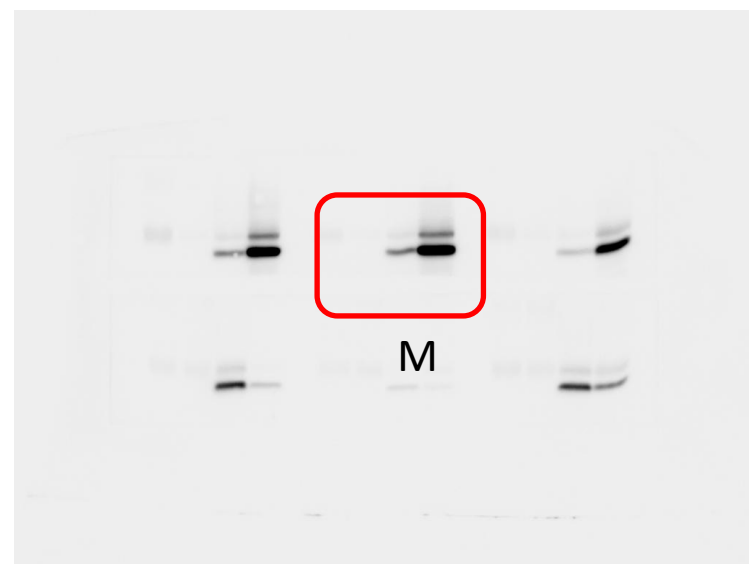

Supplement: fig6-data1 [file Figure 6F.pdf › Figure 6F.pdf]

6L

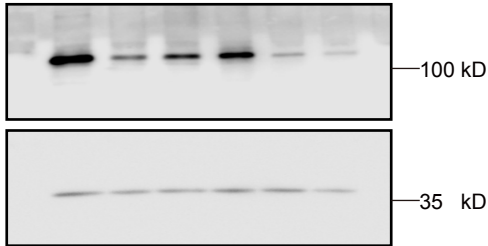

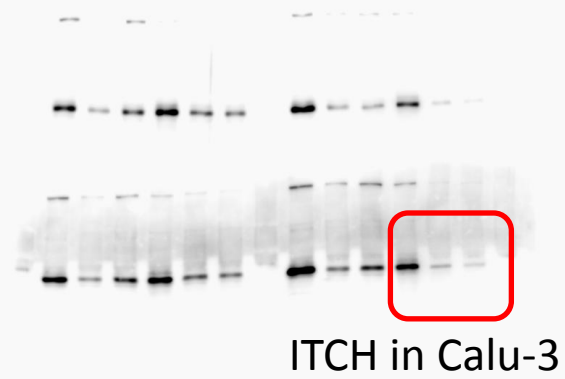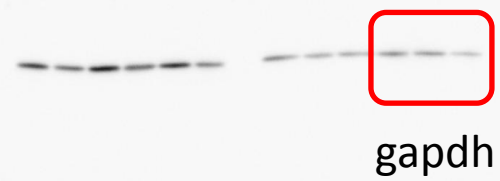

Supplement: fig6-data1 [file Figure 6L.pdf › Figure 6L.pdf]

S7A

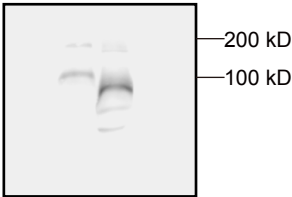

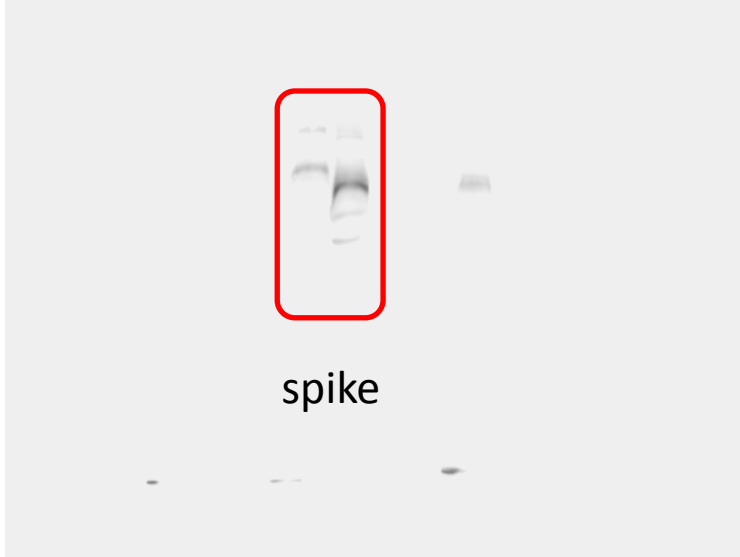

Supplement: fig6-figsupp1-data1 [file Figure 6-figure supplement 1A.pdf › Figure 6-figure supplement 1A.pdf]

S7B

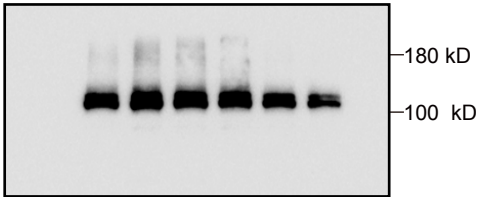

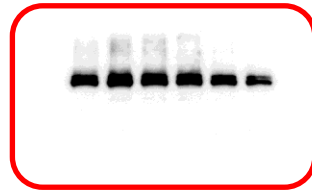

**ITCH**

Supplement: fig6-figsupp1-data1 [file Figure 6-figure supplement 1B.pdf › Figure 6-figure supplement 1B.pdf]
